# Supplementary material for: Software for pre-processing Illumina next-generation sequencing short read sequences
Source: Springer Nature journal article supplement (doi:10.1186/1751-0473-9-8), 2014-05-03
Supplement: 13029_2013_109_MOESM2_ESM.pdf [file 13029_2013_109_MOESM2_ESM.pdf]

**Table SA1-1 Summary of *Caenorhabditis elegans* trimmed data generated by *ngsShoRT* algorithms**

| Times                          | 1 5adpt                                               | 2 TERA           | 3 3end            | 4 LQR                    | 5 Mott          | 6-LQR-5adpt                                                            | 7-LQR-5adpt-TERA                                                              | 8 LQR-5adpt-Mott                                                               |
|--------------------------------|-------------------------------------------------------|------------------|-------------------|--------------------------|-----------------|------------------------------------------------------------------------|-------------------------------------------------------------------------------|--------------------------------------------------------------------------------|
| # threads                      | 32                                                    | 32               | 32                | 32                       | 32              | 32                                                                     | 32                                                                            | 32                                                                             |
| Trimming algorithm             | 5adpt                                                 | tera             | 3end              | lqr                      | mott            | lqr, 5adpt                                                             | lqr, 5adpt, tera                                                              | lqr, 5adpt, mott                                                               |
| Trimming algorithm parameters  | mrl: 21, list=Illumina adapter, action = ka, mp = 100 | mrl: 21, avg = 2 | mrl: 21, x=10     | mrl: 21, lqs = 4, p = 50 | mrl: 21, ml=0.6 | mrl: 21, lqs = 4, p = 50, list=Illumina adapter, action = ka, mp = 100 | mrl: 21, lqs = 4, p = 50, list=Illumina adapter, action = ka, mp = 100, avg=2 | mrl: 21, lqs = 4, p = 50, list=Illumina adapter, action = ka, mp = 100, ml=0.6 |
| Mean Phred quality score       | 29.53                                                 | 31.57            | 30.33             | 30.55                    | 31.57           | 30.58                                                                  | 31.96                                                                         | 31.96                                                                          |
| Low Phred quality score (<=10) | 1,899,444 (2.81%)                                     | 835,813 (1.24%)  | 1,741,324 (2.58%) | 256 (0.00%)              | 835,825 (1.24%) | 252 (0.00%)                                                            | 105 (0.00%)                                                                   | 105 (0.00%)                                                                    |
| Total runtime (mins)           | 23.51                                                 | 18.31            | 14.76             | 18.58                    | 24.65           | 26.15                                                                  | 27.3                                                                          | 33.56                                                                          |
| Peak thread runtime (mins)     | 9.35                                                  | 8.05             | 6.05              | 8.58                     | 15.31           | 12.4                                                                   | 13.6                                                                          | 20.25                                                                          |
| Merging runtime (mins)         | 14.03                                                 | 10.18            | 8.6               | 10.18                    | 9.21            | 13.61                                                                  | 13.56                                                                         | 13.18                                                                          |
| Peak RAM usage (MB)            | 84.5                                                  | 83.17            | 81.73             | 83.42                    | 85.21           | 82.08                                                                  | 85.2                                                                          | 83.7                                                                           |
| Total sequences (paired)       | 33,804,923                                            | 33,808,546       | 33,808,546        | 31,136,730               | 33,808,546      | 31,135,867                                                             | 31,135,867                                                                    | 31,135,867                                                                     |
| Total bases (paired)           | 6,727,619,415                                         | 6,198,092,855    | 6,085,538,280     | 6,227,346,000            | 6,198,004,714   | 6,195,604,058                                                          | 5,894,323,879                                                                 | 5,894,186,634                                                                  |
| Total sequences (single)       | 2,748                                                 | 0                | 0                 | 2,103,478                | 0               | 2,103,637                                                              | 2,103,637                                                                     | 2,103,637                                                                      |
| Total bases (single)           | 274,511                                               | 0                | 0                 | 210,347,800              | 0               | 210,363,569                                                            | 210,363,569                                                                   | 210,363,569                                                                    |
| Total bases                    | 6,727,893,926                                         | 6,198,092,855    | 6,085,538,280     | 6,437,693,800            | 6,198,004,714   | 6,405,967,627                                                          | 6,104,687,448                                                                 | 6,104,550,203                                                                  |

**Table SA1-2 Summary of *Saccharomyces cerevisiae* S288c trimmed data generated by ngsShoRT algorithms**

| Times                          | 1 5adpt                                               | 2 TERA           | 3 3end          | 4 LQR                    | 5 Mott          | 6-LQR-5adpt                                                            | 7-LQR-5adpt-TERA                                                              | 8 LQR-5adpt-Mott                                                               |
|--------------------------------|-------------------------------------------------------|------------------|-----------------|--------------------------|-----------------|------------------------------------------------------------------------|-------------------------------------------------------------------------------|--------------------------------------------------------------------------------|
| # threads                      | 32                                                    | 32               | 32              | 32                       | 32              | 32                                                                     | 32                                                                            | 32                                                                             |
| Trimming algorithm             | 5adpt                                                 | tera             | 3end            | lqr                      | mott            | lqr, 5adpt                                                             | lqr, 5adpt, tera                                                              | lqr, 5adpt, mott                                                               |
| Trimming algorithm parameters  | mrl: 21, list=Illumina adapter, action = ka, mp = 100 | mrl: 21, avg = 2 | mrl: 21, x=10   | mrl: 21, lqs = 4, p = 50 | mrl: 21, ml=0.6 | mrl: 21, lqs = 4, p = 50, list=Illumina adapter, action = ka, mp = 100 | mrl: 21, lqs = 4, p = 50, list=Illumina adapter, action = ka, mp = 100, avg=2 | mrl: 21, lqs = 4, p = 50, list=Illumina adapter, action = ka, mp = 100, ml=0.6 |
| Mean Phred quality score       | 34.18                                                 | 35.08            | 34.63           | 35.86                    | 35              | 35.87                                                                  | 36.32                                                                         | 36.32                                                                          |
| Low Phred quality score (<=10) | 167,587 (4.42%)                                       | 119,114 (3.14%)  | 159,108 (4.19%) | 4 (0.00%)                | 119,114 (3.14%) | 4 (0.00%)                                                              | 3 (0.00%)                                                                     | 3 (0.00%)                                                                      |
| Total runtime (mins)           | 1.45                                                  | 1.01             | 0.93            | 1.08                     | 1.42            | 1.35                                                                   | 1.6                                                                           | 1.7                                                                            |
| Peak hread runtime (mins)      | 0.7                                                   | 0.45             | 0.4             | 0.53                     | 0.88            | 0.61                                                                   | 0.83                                                                          | 1.01                                                                           |
| Merging runtime (mins)         | 0.7                                                   | 0.56             | 0.53            | 0.55                     | 0.53            | 0.73                                                                   | 0.76                                                                          | 0.68                                                                           |
| Peak RAM usage (MB)            | 82.43                                                 | 81.78            | 81.7            | 84.12                    | 81.91           | 82.59                                                                  | 84.61                                                                         | 84.76                                                                          |
| Total sequences (paired)       | 1,894,251                                             | 1,898,259        | 1,898,259       | 1,740,787                | 1,898,259       | 1,737,001                                                              | 1,737,001                                                                     | 1,737,001                                                                      |
| Total bases (paired)           | 287,920,526                                           | 272,556,467      | 250,570,188     | 264,599,624              | 272,556,067     | 264,020,941                                                            | 260,037,396                                                                   | 260,037,396                                                                    |
| Total sequences (single)       | 4,008                                                 | 0                | 0               | 102,619                  | 0               | 106,405                                                                | 106,405                                                                       | 106,405                                                                        |
| Total bases (single)           | 304,608                                               | 0                | 0               | 7,799,044                | 0               | 8,086,780                                                              | 8,086,780                                                                     | 8,086,780                                                                      |
| Total bases                    | 288,225,134                                           | 272,556,467      | 250,570,188     | 272,398,668              | 272,556,067     | 272,107,721                                                            | 268,124,176                                                                   | 268,124,176                                                                    |

**Table SA1-3 Summary of *Escherichia coli* O157 H7 trimmed data generated by ngsShoRT algorithms**

| Times                          | 1 5adpt                                               | 2 TERA           | 3 3end         | 4 LQR                    | 5 Mott          | 6-LQR-5adpt                                                            | 7-LQR-5adpt-TERA                                                              | 8 LQR-5adpt-Mott                                                               |
|--------------------------------|-------------------------------------------------------|------------------|----------------|--------------------------|-----------------|------------------------------------------------------------------------|-------------------------------------------------------------------------------|--------------------------------------------------------------------------------|
| # threads                      | 32                                                    | 32               | 32             | 32                       | 32              | 32                                                                     | 32                                                                            | 32                                                                             |
| Trimming algorithm             | 5adpt                                                 | tera             | 3end           | lqr                      | mott            | lqr, 5adpt                                                             | lqr, 5adpt, tera                                                              | lqr, 5adpt, mott                                                               |
| Trimming algorithm parameters  | mrl: 21, list=Illumina adapter, action = ka, mp = 100 | mrl: 21, avg = 2 | mrl: 21, x=10  | mrl: 21, lqs = 4, p = 50 | mrl: 21, ml=0.6 | mrl: 21, lqs = 4, p = 50, list=Illumina adapter, action = ka, mp = 100 | mrl: 21, lqs = 4, p = 50, list=Illumina adapter, action = ka, mp = 100, avg=2 | mrl: 21, lqs = 4, p = 50, list=Illumina adapter, action = ka, mp = 100, ml=0.6 |
| Mean Phred quality score       | 33.14                                                 | 34.17            | 33.5           | 33.85                    | 34.17           | 33.87                                                                  | 34.35                                                                         | 34.35                                                                          |
| Low Phred quality score (<=10) | 76,569 (1.71%)                                        | 10,492 (0.23%)   | 69,820 (1.56%) | 0 (0.00%)                | 10492 (0.23%)   | 0 (0.00%)                                                              | 0 (0.00%)                                                                     | 0 (0.00%)                                                                      |
| Total runtime (mins)           | 1.9                                                   | 1.43             | 1.25           | 1.53                     | 2.25            | 1.88                                                                   | 2.06                                                                          | 2.6                                                                            |
| Peak thread runtime (mins)     | 0.9                                                   | 0.67             | 0.52           | 0.78                     | 1.51            | 1.03                                                                   | 1.18                                                                          | 1.73                                                                           |
| Merging runtime (mins)         | 0.98                                                  | 0.76             | 0.73           | 0.73                     | 0.71            | 0.83                                                                   | 0.86                                                                          | 0.86                                                                           |
| Peak RAM usage (MB)            | 82.02                                                 | 82.76            | 83.44          | 82.95                    | 84.98           | 84.5                                                                   | 84.01                                                                         | 83.21                                                                          |
| Total sequences (paired)       | 2,241,777                                             | 2,241,778        | 2,241,778      | 2,113,808                | 2,241,778       | 2,113,807                                                              | 2,113,807                                                                     | 2,113,807                                                                      |
| Total bases (paired)           | 670,699,844                                           | 646,423,163      | 627,697,840    | 634,142,400              | 646,418,288     | 632,339,583                                                            | 621,772,745                                                                   | 621,769,058                                                                    |
| Total sequences (single)       | 1                                                     | 0                | 0              | 118,827                  | 0               | 118,828                                                                | 118,828                                                                       | 118,828                                                                        |
| Total bases (single)           | 150                                                   | 0                | 0              | 17,824,050               | 0               | 17,824,200                                                             | 17,824,200                                                                    | 17,824,200                                                                     |
| Total bases (Million)          | 670,699.994                                           | 646,423.163      | 627,697.840    | 651,966.450              | 646,418.288     | 650,163.783                                                            | 639,596.945                                                                   | 639,593.258                                                                    |

**Table SA2-1 Summary of *Caenorhabditis elegans* de novo genome assemblies of raw and trimmed data generated by *ngsShoRT* algorithms**

| <b>DataSet</b>                     | <b>Raw</b>       | <b>1 5adpt</b>   | <b>2 TERA</b>    | <b>3 3end</b>    | <b>4 LQR</b>     | <b>5 Mott</b>    | <b>6-LQR-5adpt</b> | <b>7-LQR-5adpt-TERA</b> | <b>8 LQR-5adpt-Mott</b> |
|------------------------------------|------------------|------------------|------------------|------------------|------------------|------------------|--------------------|-------------------------|-------------------------|
| <b>VelvetOptimiser K-mer range</b> | 21 to 71, step 2 | 21 to 71, step 2 | 21 to 71, step 2 | 21 to 71, step 2 | 21 to 71, step 2 | 21 to 71, step 2 | 21 to 71, step 2   | 21 to 71, step 2        | 21 to 71, step 2        |
| <b>Optimal K-mer</b>               | 59               | 57               | 53               | 55               | 59               | 53               | 59                 | 55                      | 55                      |
| <b>Total contigs length (bp)</b>   | 99,712,970       | 100,450,601      | 100,071,634      | 100,319,545      | 100,597,965      | 100,060,740      | 100,608,320        | 100,270,458             | 100,267,229             |
| <b>Total # contigs</b>             | 10,789           | 10,404           | 10,776           | 10,383           | 10,549           | 10,755           | 10,573             | 10,792                  | 10,781                  |
| <b>Max contig length (bp)</b>      | 242,599          | 313,669          | 354,328          | 246,594          | 313,984          | 354,102          | 313,982            | 286,554                 | 286,554                 |
| <b>E-size (bp)</b>                 | 45,484           | 51,429           | 47,096           | 49,483           | 50,183           | 47,424           | 50,225             | 47,516                  | 47,577                  |
| <b>N25 (bp)</b>                    | 62,833           | 67,636           | 62,934           | 66,635           | 67,555           | 63,244           | 67,555             | 64,578                  | 64,665                  |
| <b>N50 (bp)</b>                    | 32,064           | 35,124           | 32,417           | 34,566           | 34,320           | 32,509           | 34,603             | 32,606                  | 32,606                  |
| <b>N75 (bp)</b>                    | 14,163           | 15,640           | 14,589           | 15,704           | 15,429           | 14,684           | 15,391             | 14,440                  | 14,444                  |
| <b>N90 (bp)</b>                    | 5,637            | 6,187            | 5,709            | 6,093            | 6,059            | 5,713            | 6,039              | 5,719                   | 5,713                   |
| <b>GC content (%)</b>              | 35.78            | 35.88            | 35.8             | 35.86            | 35.86            | 35.8             | 35.86              | 35.79                   | 35.79                   |
| <b>Velveth runtime (mins)</b>      | 13.85            | 13.76            | 11.23            | 10.76            | 10.35            | 11.5             | 11                 | 10.7                    | 10.48                   |
| <b>Velveth peak RAM usage (MB)</b> | 33292.17         | 41054.26         | 16867.36         | 26148.76         | 23361.7          | 31367.98         | 25280.1            | 18661.54                | 18657.1                 |
| <b>Velvetg runtime (mins)</b>      | 34.18            | 31.91            | 31.67            | 31.52            | 32.06            | 33.8             | 31.76              | 32.08                   | 32.46                   |
| <b>Velvetg peak RAM usage (MB)</b> | 16227.09         | 16250.76         | 15450.44         | 15487.39         | 15064.87         | 15305.32         | 15900.02           | 15584.98                | 15586.46                |
| <b>Velvet runtime (mins)</b>       | 48.03            | 45.67            | 42.9             | 42.28            | 42.41            | 45.3             | 42.76              | 42.78                   | 42.94                   |
| <b>Velvet peak RAM usage (MB)</b>  | 49519.26         | 57305.02         | 32317.8          | 41636.15         | 38426.57         | 46673.3          | 41180.12           | 34246.52                | 34243.56                |

**Table SA2-2 Summary of *Saccharomyces cerevisiae* S288c *de novo* genome assemblies of raw and trimmed data generated by ngsShoRT algorithms**

| <b>DataSet</b>                     | <b>Raw</b>       | <b>1 5adpt</b>   | <b>2 TERA</b>    | <b>3 3end</b>    | <b>4 LQR</b>     | <b>5 Mott</b>    | <b>6-LQR-5adpt</b> | <b>7-LQR-5adpt-TERA</b> | <b>8 LQR-5adpt-Mott</b> |
|------------------------------------|------------------|------------------|------------------|------------------|------------------|------------------|--------------------|-------------------------|-------------------------|
| <b>VelvetOptimiser K-mer range</b> | 21 to 71, step 2 | 21 to 71, step 2 | 21 to 71, step 2 | 21 to 71, step 2 | 21 to 71, step 2 | 21 to 71, step 2 | 21 to 71, step 2   | 21 to 71, step 2        | 21 to 71, step 2        |
| <b>Optimal K-mer</b>               | 31               | 31               | 33               | 31               | 31               | 33               | 33                 | 33                      | 33                      |
| <b>Total contigs length (bp)</b>   | 11,459,063       | 11,458,557       | 11,471,167       | 11,453,735       | 11,459,492       | 11,471,030       | 11,470,227         | 11,470,472              | 11,471,278              |
| <b>Total # contigs</b>             | 1097             | 1,032            | 1,057            | 1,135            | 1,053            | 1,057            | 1,062              | 1,068                   | 1,064                   |
| <b>Max contig length (bp)</b>      | 101,217          | 123,093          | 102,654          | 95,726           | 102,663          | 102,654          | 102,651            | 102,652                 | 102,652                 |
| <b>E-size (bp)</b>                 | 27,917           | 32,412           | 30,607           | 28,027           | 31,744           | 30,610           | 31,238             | 30,460                  | 30,543                  |
| <b>N25 (bp)</b>                    | 39,313           | 46,832           | 45,306           | 39,910           | 46,227           | 45,306           | 47,090             | 45,309                  | 45,309                  |
| <b>N50 (bp)</b>                    | 26,221           | 29,080           | 28,539           | 26,386           | 28,753           | 28,692           | 28,769             | 27,918                  | 28,152                  |
| <b>N75 (bp)</b>                    | 14,483           | 16,450           | 15,439           | 13,864           | 15,642           | 15,439           | 15,515             | 14,903                  | 14,903                  |
| <b>N90 (bp)</b>                    | 7,100            | 8,320            | 7,384            | 6,866            | 7,828            | 7,708            | 7,285              | 7,180                   | 7,288                   |
| <b>GC content (%)</b>              | 38.1             | 38.07            | 38.06            | 38.06            | 38.08            | 38.06            | 38.07              | 38.06                   | 38.06                   |
| <b>Velveth runtime (mins)</b>      | 0.5              | 0.47             | 0.42             | 0.42             | 0.42             | 0.43             | 0.42               | 0.42                    | 0.42                    |
| <b>Velveth peak RAM usage (MB)</b> | 2386.38          | 1953.91          | 1972.8           | 1701.79          | 1475.32          | 1972.27          | 1475.77            | 1370.6                  | 1372.48                 |
| <b>Velvetg runtime (mins)</b>      | 1.58             | 1.62             | 1.45             | 1.45             | 1.52             | 1.5              | 1.48               | 1.45                    | 1.43                    |
| <b>Velvetg peak RAM usage (MB)</b> | 1528.89          | 1541.94          | 1457.18          | 1401.07          | 1474.82          | 1457.29          | 1454.1             | 1440.28                 | 1439.76                 |
| <b>Velvet runtime (mins)</b>       | 2.08             | 2.09             | 1.87             | 1.87             | 1.94             | 1.93             | 1.9                | 1.87                    | 1.85                    |
| <b>Velvet peak RAM usage (MB)</b>  | 3915.27          | 3495.85          | 3429.98          | 3102.86          | 2950.14          | 3429.56          | 2929.87            | 2810.88                 | 2812.24                 |

**Table SA2-3 Summary of *Escherichia coli* O157 H7 de novo genome assemblies of raw and trimmed data generated by ngsShoRT algorithms**

| <b>DataSet</b>                     | <b>Raw</b>        | <b>1_5adpt</b>    | <b>2_TERA</b>     | <b>3_3end</b>     | <b>4_LQR</b>      | <b>5_Mott</b>     | <b>6-LQR-5adpt</b> | <b>7-LQR-5adpt-TERA</b> | <b>8_LQR-5adpt-Mott</b> |
|------------------------------------|-------------------|-------------------|-------------------|-------------------|-------------------|-------------------|--------------------|-------------------------|-------------------------|
| <b>VelvetOptimiser K-mer range</b> | 21 to 101, step 2 | 21 to 101, step 2 | 21 to 101, step 2 | 21 to 101, step 2 | 21 to 101, step 2 | 21 to 101, step 2 | 21 to 101, step 2  | 21 to 101, step 2       | 21 to 101, step 2       |
| <b>Optimal K-mer</b>               | 65                | 83                | 81                | 81                | 63                | 53                | 63                 | 79                      | 79                      |
| <b>Total contigs length (bp)</b>   | 5,343,509         | 5,377,817         | 5,376,030         | 5,376,062         | 5,343,371         | 5,318,483         | 5,345,366          | 5,373,725               | 5,374,022               |
| <b>Total # contigs</b>             | 417               | 429               | 426               | 433               | 415               | 413               | 419                | 428                     | 429                     |
| <b>Max contig length (bp)</b>      | 440,689           | 440,768           | 440,755           | 440,783           | 440,676           | 440,600           | 440,675            | 440,751                 | 440,751                 |
| <b>E-size (bp)</b>                 | 144,862           | 154,338           | 165,801           | 157,755           | 148206            | 152,471           | 149,904            | 166,198                 | 164,754                 |
| <b>N25 (bp)</b>                    | 206,077           | 201,538           | 269,539           | 217,745           | 217,634           | 219,582           | 217,634            | 269,465                 | 238,346                 |
| <b>N50 (bp)</b>                    | 138,164           | 133,303           | 146,563           | 142,592           | 133,173           | 145,302           | 142,431            | 146,559                 | 146,559                 |
| <b>N75 (bp)</b>                    | 55,036            | 58,448            | 65,903            | 61,027            | 55,026            | 49,914            | 55,026             | 65,899                  | 63,153                  |
| <b>N90 (bp)</b>                    | 19,524            | 19,668            | 25,042            | 21,821            | 21,336            | 20,376            | 21,336             | 26,226                  | 26,226                  |
| <b>GC content (%)</b>              | 50.24             | 50.24             | 50.25             | 50.25             | 50.24             | 50.23             | 50.24              | 50.25                   | 50.25                   |
| <b>Velveth runtime (mins)</b>      | 1.82              | 0.8               | 0.75              | 1.15              | 0.83              | 0.86              | 1.32               | 1.55                    | 1.46                    |
| <b>Velveth peak RAM usage (MB)</b> | 3039.85           | 2823.38           | 2921.06           | 2318.01           | 2434.88           | 2932.83           | 2327.39            | 1935.74                 | 1935.88                 |
| <b>Velvetg runtime (mins)</b>      | 1.98              | 1.75              | 1.72              | 1.68              | 1.98              | 2.18              | 2.02               | 1.72                    | 1.7                     |
| <b>Velvetg peak RAM usage (MB)</b> | 1171.93           | 1228.18           | 1192.27           | 1149.82           | 1203.38           | 1383.91           | 1201.78            | 1181.9                  | 118.15                  |
| <b>Velvet runtime (mins)</b>       | 3.8               | 2.55              | 2.47              | 2.83              | 2.81              | 3.04              | 3.34               | 3.27                    | 3.16                    |
| <b>Velvet peak RAM usage (MB)</b>  | 4211.78           | 4051.56           | 4113.33           | 3467.83           | 3638.26           | 4316.74           | 3529.17            | 3117.64                 | 3117.03                 |

**Table SA3-1 Correctness of *Caenorhabditis elegans* de novo genome assemblies of raw and trimmed data generated by ngsShoRT algorithms**

| DataSet                               | Raw                    | 1_5adpt                | 2_TERA                 | 3_3end                 | 4_LQR                  | 5_Mott                 | 6-LQR-5adpt            | 7-LQR-5adpt-TERA       | 8_LQR-5adpt-Mott       |
|---------------------------------------|------------------------|------------------------|------------------------|------------------------|------------------------|------------------------|------------------------|------------------------|------------------------|
| <b>Reference genome size</b>          | 100,286,401            | 100,286,401            | 100,286,401            | 100,286,401            | 100,286,401            | 100,286,401            | 100,286,401            | 100,286,401            | 100,286,401            |
| <b>Reference genome coverage</b>      | 98,403,841<br>(98.12%) | 98,822,655<br>(98.54%) | 98,392,719<br>(98.11%) | 98,669,067<br>(98.39%) | 98,939,675<br>(98.66%) | 98,393,760<br>(98.11%) | 98,944,939<br>(98.66%) | 98,563,710<br>(98.28%) | 98,569,358<br>(98.29%) |
| <b>Total contigs</b>                  | 10,789                 | 10,404                 | 10,776                 | 10,352                 | 10,549                 | 10,755                 | 10,573                 | 10,792                 | 10,781                 |
| <b>Aligned contigs</b>                | 10,569 (97.96%)        | 10,242 (98.44%)        | 10,611 (98.47%)        | 10,185 (98.39%)        | 10,387 (98.46%)        | 10,590 (98.47%)        | 10,413 (98.49%)        | 10,613 (98.34%)        | 10,604 (98.36%)        |
| <b>Avg identity (%) (1-1 mapping)</b> | 99.96                  | 99.96                  | 99.94                  | 99.95                  | 99.96                  | 99.94                  | 99.96                  | 99.94                  | 99.94                  |
| <b>Avg identity (%) (m-m mapping)</b> | 99.85                  | 99.85                  | 99.84                  | 99.85                  | 99.85                  | 99.84                  | 99.85                  | 99.84                  | 99.84                  |
| <b>TotalSNPs</b>                      | 9,140                  | 9,868                  | 9,860                  | 9,358                  | 8,882                  | 9,717                  | 9,105                  | 9,008                  | 9,076                  |

**Table SA3-2 Correctness of *Saccharomyces cerevisiae* S288c de novo genome assemblies of raw and trimmed data generated by ngsShoRT algorithms**

| DataSet                        | Raw                 | 1_5adpt             | 2_TERA              | 3_3end              | 4_LQR             | 5_Mott              | 6-LQR-5adpt         | 7-LQR-5adpt-TERA    | 8_LQR-5adpt-Mott    |
|--------------------------------|---------------------|---------------------|---------------------|---------------------|-------------------|---------------------|---------------------|---------------------|---------------------|
| Reference genome size          | 12,157,105          | 12,157,105          | 12,157,105          | 12,157,105          | 12,157,105        | 12,157,105          | 12,157,105          | 12,157,105          | 12,157,105          |
| Reference genome coverage      | 11,738,621 (96.56%) | 11,761,633 (96.75%) | 11,809,050 (97.14%) | 11,781,549 (96.91%) | 11766257 (96.79%) | 11,734,644 (96.52%) | 11,731,863 (96.50%) | 11,806,630 (97.12%) | 11,789,294 (96.97%) |
| Total contigs                  | 1,097               | 1,032               | 1,124               | 1,035               | 1,040             | 1,135               | 1,054               | 1,057               | 1,053               |
| Aligned contigs                | 1,090 (99.36%)      | 1,018 (98.64%)      | 1,116 (99.29%)      | 1,023 (98.84%)      | 1,027 (98.75%)    | 1,114 (98.15%)      | 1,039 (98.58%)      | 1,050 (99.34%)      | 1,041 (98.86%)      |
| Avg identity (%) (1-1 mapping) | 99.96               | 99.97               | 99.97               | 99.97               | 99.97             | 99.95               | 99.97               | 99.96               | 99.97               |
| Avg identity (%) (m-m mapping) | 99.95               | 99.95               | 99.95               | 99.95               | 99.95             | 99.94               | 99.95               | 99.94               | 99.96               |
| TotalSNPs                      | 786                 | 730                 | 621                 | 729                 | 739               | 781                 | 882                 | 598                 | 654                 |

**Table SA3-3 Correctness of *Escherichia coli* O157 H7 de novo genome assemblies of raw and trimmed data generated by ngsShoRT algorithms**

| DataSet                        | Raw                 | 1_5adpt             | 2_TERA                | 3_3end                | 4_LQR                 | 5_Mott              | 6-LQR-5adpt           | 7-LQR-5adpt-TERA | 8_LQR-5adpt-Mott |
|--------------------------------|---------------------|---------------------|-----------------------|-----------------------|-----------------------|---------------------|-----------------------|------------------|------------------|
| Reference genome size          | 5,498,450           | 5,498,450           | 5,498,450             | 5,498,450             | 5,498,450             | 5,498,450           | 5,498,450             | 5,498,450        | 5,498,450        |
| Reference genome coverage      | 5363955<br>(97.55%) | 5384193<br>(97.92%) | 5,389,948<br>(98.03%) | 5,384,971<br>(97.94%) | 5,378,185<br>(97.81%) | 5361630<br>(97.51%) | 5,376,324<br>(97.78%) | 5383225 (97.90%) | 5366345 (97.60%) |
| Total contigs                  | 417                 | 429                 | 565                   | 432                   | 425                   | 413                 | 416                   | 426              | 415              |
| Aligned contigs                | 409 (98.08%)        | 427 (99.53%)        | 563 (99.65%)          | 430 (99.54%)          | 420 (98.82%)          | 406 (98.31%)        | 411 (98.80%)          | 423 (99.30%)     | 407 (98.07%)     |
| Avg identity (%) (1-1 mapping) | 99.95               | 99.95               | 99.96                 | 99.95                 | 99.95                 | 99.95               | 99.96                 | 99.95            | 99.96            |
| Avg identity (%) (m-m mapping) | 99.9                | 99.89               | 99.9                  | 99.89                 | 99.89                 | 99.9                | 99.9                  | 99.9             | 99.9             |
| TotalSNPs                      | 1,859               | 1,929               | 1,758                 | 1,936                 | 1,952                 | 1,823               | 1,766                 | 1,899            | 1,847            |

**Table SA4-1 Summary of *Caenorhabditis elegans* reference-based assemblies of raw and trimmed data generated by *ngsShoRT* algorithms**

| DataSet                           | Raw                 | 1_5adpt             | 2_TERA              | 3_3end              | 4_LQR               | 5_Mott              | 6-LQR-5adpt         | 7-LQR-5adpt-TERA    | 8_LQR-5adpt-Mott    |
|-----------------------------------|---------------------|---------------------|---------------------|---------------------|---------------------|---------------------|---------------------|---------------------|---------------------|
| Reference genome size             | 100,286,401         | 100,286,401         | 100,286,401         | 100,286,401         | 100,286,401         | 100,286,401         | 100,286,401         | 100,286,401         | 100,286,401         |
| Number of reads                   | 68,029,090          | 68,024,577          | 67,948,294          | 67,901,888          | 64,751,598          | 67,948,294          | 64,750,021          | 64,712,569          | 64,712,569          |
| Mapped reads                      | 65,108,539 / 95.71% | 65,107,835 / 95.71% | 64,580,965 / 95.04% | 64,966,762 / 95.68% | 62,368,674 / 96.32% | 64,582,097 / 95.05% | 62,368,664 / 96.32% | 62,326,365 / 96.31% | 62,326,364 / 96.31% |
| Unmapped reads                    | 2,920,551 / 4.29%   | 2,916,742 / 4.29%   | 3,367,329 / 4.96%   | 2,935,126 / 4.32%   | 2,382,924 / 3.68%   | 3,366,197 / 4.95%   | 2,381,357 / 3.68%   | 2,386,204 / 3.69%   | 2,386,205 / 3.69%   |
| Paired reads                      | 65,108,539 / 95.71% | 65,107,653 / 95.71% | 64,580,965 / 95.04% | 64,966,762 / 95.68% | 60,429,886 / 93.33% | 64,582,097 / 95.05% | 60,429,873 / 93.33% | 60,387,574 / 93.32% | 60,387,573 / 93.32% |
| Mapped reads, only first in pair  | 32,603,951 / 47.93% | 32,603,560 / 47.93% | 32,412,953 / 47.7%  | 32,535,473 / 47.92% | 30,206,558 / 46.65% | 32,414,026 / 47.7%  | 30,206,568 / 46.65% | 30,186,321 / 46.65% | 30,186,320 / 46.65% |
| Mapped reads, only second in pair | 32,504,588 / 47.78% | 32,504,093 / 47.78% | 32,168,012 / 47.34% | 32,431,289 / 47.76% | 30,223,328 / 46.68% | 32,168,071 / 47.34% | 30,223,305 / 46.68% | 30,201,253 / 46.67% | 30,201,253 / 46.67% |
| Mapped reads, both in pair        | 64,782,848 / 95.23% | 64,782,175 / 95.23% | 64,044,875 / 94.26% | 64,631,660 / 95.18% | 60,307,426 / 93.14% | 64,045,411 / 94.26% | 60,307,390 / 93.14% | 60,260,972 / 93.12% | 60,260,972 / 93.12% |
| Mapped reads, singletons          | 325,691 / 0.48%     | 325,478 / 0.48%     | 536,090 / 0.79%     | 335,102 / 0.49%     | 122,460 / 0.19%     | 536,686 / 0.79%     | 122,483 / 0.19%     | 126,602 / 0.2%      | 126,601 / 0.2%      |
| Read min/max/mean length          | 30 / 100 / 99.64    | 21 / 100 / 99.15    | 21 / 100 / 91.41    | 30 / 90 / 89.78     | 30 / 100 / 99.65    | 21 / 100 / 91.41    | 21 / 100 / 99.17    | 21 / 100 / 94.54    | 21 / 100 / 94.54    |
| Clipped reads                     | 6,368,951 / 9.36%   | 5,746,286 / 8.45%   | 3,555,657 / 5.23%   | 4,881,239 / 7.19%   | 5,057,053 / 7.81%   | 3,552,831 / 5.23%   | 4,462,053 / 6.89%   | 3,093,114 / 4.78%   | 3,092,255 / 4.78%   |
| Duplication rate                  | 31.14%              | 31.22%              | 30.99%              | 31.01%              | 30.33%              | 30.99%              | 30.40%              | 30.41%              | 30.41%              |
| GC (%)                            | 34.15%              | 34.15%              | 33.74%              | 34.09%              | 33.98%              | 33.74%              | 33.98%              | 33.70%              | 33.70%              |
| Total reads with indels           | 521,946             | 522,212             | 330,934             | 433,970             | 431,268             | 330,864             | 431,385             | 327,210             | 327,313             |
| Insertions                        | 211,101             | 211,200             | 129,093             | 175,048             | 171,387             | 128,999             | 171,450             | 128,402             | 128,471             |
| Deletions                         | 310,845             | 311,012             | 201,841             | 258,922             | 259,881             | 201,865             | 259,935             | 198,808             | 198,842             |
| Mean insert size                  | 244.42              | 244.27              | 243.48              | 244.14              | 243.82              | 243.47              | 243.82              | 243.26              | 243.26              |
| Median insert size                | 252                 | 252                 | 252                 | 252                 | 251                 | 252                 | 251                 | 251                 | 251                 |
| Mapping runtime (mins)            | 16.35               | 16.71               | 15.8                | 15.88               | 14.28               | 15.05               | 14.75               | 15.7                | 14.7                |

**Table SA4-2 Summary of *Saccharomyces cerevisiae* S288c reference-based assemblies of raw and trimmed data generated by *ngsShoRT* algorithms**

| DataSet                           | Raw                | 1_5adpt            | 2_TERA             | 3_3end             | 4_LQR              | 5_Mott             | 6-LQR-5adpt        | 7-LQR-5adpt-TERA   | 8_LQR-5adpt-Mott   |
|-----------------------------------|--------------------|--------------------|--------------------|--------------------|--------------------|--------------------|--------------------|--------------------|--------------------|
| Reference genome size             | 12,157,105         | 12,157,105         | 12,157,105         | 12,157,105         | 12,157,105         | 12,157,105         | 12,157,105         | 12,157,105         | 12,157,105         |
| Number of reads                   | 3,803,781          | 3,799,773          | 3,802,165          | 3,800,411          | 3,590,603          | 3,802,165          | 3,586,817          | 3,586,640          | 3,586,640          |
| Mapped reads                      | 3,628,753 / 95.4%  | 3,628,737 / 95.5%  | 3,568,113 / 93.84% | 3,623,766 / 95.35% | 3,498,316 / 97.43% | 3,568,113 / 93.84% | 3,498,300 / 97.53% | 3,498,053 / 97.53% | 3,498,053 / 97.53% |
| Unmapped reads                    | 175,028 / 4.6%     | 171,036 / 4.5%     | 234,052 / 6.16%    | 176,645 / 4.65%    | 92,287 / 2.57%     | 234,052 / 6.16%    | 88,517 / 2.47%     | 88,587 / 2.47%     | 88,587 / 2.47%     |
| Paired reads                      | 3,628,753 / 95.4%  | 3,628,737 / 95.5%  | 3,568,113 / 93.84% | 3,623,766 / 95.35% | 3,407,454 / 94.9%  | 3,568,113 / 93.84% | 3,407,438 / 95%    | 3,407,191 / 95%    | 3,407,191 / 95%    |
| Mapped reads, only first in pair  | 1,805,405 / 47.46% | 1,805,397 / 47.51% | 1,778,833 / 46.78% | 1,804,231 / 47.47% | 1,702,837 / 47.42% | 1,778,833 / 46.78% | 1,702,829 / 47.47% | 1,702,734 / 47.47% | 1,702,734 / 47.47% |
| Mapped reads, only second in pair | 1,823,348 / 47.94% | 1,823,340 / 47.99% | 1,789,280 / 47.06% | 1,819,535 / 47.88% | 1,704,617 / 47.47% | 1,789,280 / 47.06% | 1,704,609 / 47.52% | 1,704,457 / 47.52% | 1,704,457 / 47.52% |
| Mapped reads, both in pair        | 3,590,695 / 94.4%  | 3,590,679 / 94.5%  | 3,527,381 / 92.77% | 3,586,298 / 94.37% | 3,406,934 / 94.88% | 3,527,381 / 92.77% | 3,406,918 / 94.98% | 3,406,614 / 94.98% | 3,406,614 / 94.98% |
| Mapped reads, singletons          | 38,058 / 1%        | 38,058 / 1%        | 40,732 / 1.07%     | 37,468 / 0.99%     | 520 / 0.01%        | 40,732 / 1.07%     | 520 / 0.01%        | 577 / 0.02%        | 577 / 0.02%        |
| Read min/max/mean length          | 29 / 76 / 75.92    | 21 / 76 / 75.92    | 21 / 76 / 71.74    | 30 / 66 / 65.97    | 29 / 76 / 75.93    | 21 / 76 / 71.74    | 21 / 76 / 75.93    | 21 / 76 / 74.82    | 21 / 76 / 74.82    |
| Clipped reads                     | 143,865 / 3.78%    | 143,808 / 3.78%    | 64,753 / 1.7%      | 81,541 / 2.15%     | 93,103 / 2.59%     | 64,748 / 1.7%      | 93,030 / 2.59%     | 68,252 / 1.9%      | 68,249 / 1.9%      |
| Duplication rate                  | 15.08%             | 15.08%             | 14.94%             | 14.70%             | 14.59%             | 14.94%             | 14.59%             | 14.70%             | 14.70%             |
| GC (%)                            | 39.11%             | 39.11%             | 39.00%             | 39.08%             | 39.06%             | 39.00%             | 39.06%             | 38.99%             | 38.99%             |
| Total reads with indels           | 13,683             | 13,690             | 8,350              | 10,925             | 10,756             | 8,352              | 10,761             | 8,413              | 8,409              |
| Insertions                        | 5,144              | 5,152              | 2,855              | 3,934              | 3,951              | 2,853              | 3,941              | 2,924              | 2,921              |
| Deletions                         | 8,539              | 8,538              | 5,495              | 6,991              | 6,805              | 5,499              | 6,820              | 5,489              | 5,488              |
| Mean insert size                  | 169.86             | 169.87             | 170.07             | 169.79             | 170.12             | 170.06             | 170.12             | 170.18             | 170.18             |
| Median insert size                | 154                | 154                | 154                | 154                | 154                | 154                | 154                | 154                | 154                |
| Mapping runtime (mins)            | 1.32               | 0.83               | 0.93               | 1.01               | 0.68               | 0.82               | 0.83               | 0.73               | 0.8                |

**Table SA4-3 Summary of *Escherichia coli* O157 H7 reference-based assemblies of raw and trimmed data generated by *ngsShoRT* algorithms**

| DataSet                           | Raw                | 1_5adpt            | 2_TERA             | 3_3end             | 4_LQR              | 5_Mott             | 6-LQR-5adpt        | 7-LQR-5adpt-TERA   | 8_LQR-5adpt-Mott   |
|-----------------------------------|--------------------|--------------------|--------------------|--------------------|--------------------|--------------------|--------------------|--------------------|--------------------|
| Reference genome size             | 5,498,450          | 5,498,450          | 5,498,450          | 5,498,450          | 5,498,450          | 5,498,450          | 5,498,450          | 5,498,450          | 5,498,450          |
| Number of reads                   | 4,490,536          | 4,490,534          | 4,490,265          | 4,489,637          | 4,353,255          | 4,490,265          | 4,353,253          | 4,353,151          | 4,353,151          |
| Mapped reads                      | 4,347,142 / 96.81% | 4,347,138 / 96.81% | 4,335,353 / 96.55% | 4,345,328 / 96.79% | 4,218,371 / 96.9%  | 4,335,353 / 96.55% | 4,218,368 / 96.9%  | 4,218,103 / 96.9%  | 4,218,103 / 96.9%  |
| Unmapped reads                    | 143,394 / 3.19%    | 143,396 / 3.19%    | 154,912 / 3.45%    | 144,309 / 3.21%    | 134,884 / 3.1%     | 154,912 / 3.45%    | 134,885 / 3.1%     | 135,048 / 3.1%     | 135,048 / 3.1%     |
| Paired reads                      | 4,347,142 / 96.81% | 4,347,137 / 96.81% | 4,335,353 / 96.55% | 4,345,328 / 96.79% | 4,102,953 / 94.25% | 4,335,353 / 96.55% | 4,102,949 / 94.25% | 4,102,684 / 94.25% | 4,102,684 / 94.25% |
| Mapped reads, only first in pair  | 2,175,571 / 48.45% | 2,175,570 / 48.45% | 2,174,913 / 48.44% | 2,174,613 / 48.44% | 2,051,407 / 47.12% | 2,174,913 / 48.44% | 2,051,406 / 47.12% | 2,051,320 / 47.12% | 2,051,320 / 47.12% |
| Mapped reads, only second in pair | 2,171,571 / 48.36% | 2,171,567 / 48.36% | 2,160,440 / 48.11% | 2,170,715 / 48.35% | 2,051,546 / 47.13% | 2,160,440 / 48.11% | 2,051,543 / 47.13% | 2,051,364 / 47.12% | 2,051,364 / 47.12% |
| Mapped reads, both in pair        | 4,340,744 / 96.66% | 4,340,737 / 96.66% | 4,318,400 / 96.17% | 4,338,554 / 96.63% | 4,101,058 / 94.21% | 4,318,400 / 96.17% | 4,101,053 / 94.21% | 4,100,698 / 94.2%  | 4,100,698 / 94.2%  |
| Mapped reads, singletons          | 6,398 / 0.14%      | 6,400 / 0.14%      | 16,953 / 0.38%     | 6,774 / 0.15%      | 1,895 / 0.04%      | 16,953 / 0.38%     | 1,896 / 0.04%      | 1,986 / 0.05%      | 1,986 / 0.05%      |
| Read min/max/mean length          | 30 / 150 / 149.85  | 30 / 150 / 149.44  | 21 / 150 / 144.04  | 30 / 140 / 139.88  | 30 / 150 / 149.85  | 21 / 150 / 144.04  | 30 / 150 / 149.43  | 30 / 150 / 147.01  | 30 / 150 / 147.01  |
| Clipped reads                     | 817,083 / 18.2%    | 775,935 / 17.28%   | 665,970 / 14.83%   | 537,645 / 11.98%   | 756,534 / 17.38%   | 665,960 / 14.83%   | 716,072 / 16.45%   | 628,986 / 14.45%   | 628,973 / 14.45%   |
| Duplication rate                  | 37.31%             | 37.36%             | 37.14%             | 36.84%             | 36.60%             | 37.15%             | 36.66%             | 36.62%             | 36.63%             |
| GC (%)                            | 50.86%             | 50.87%             | 50.72%             | 50.86%             | 50.76%             | 50.72%             | 50.76%             | 50.69%             | 50.69%             |
| Total reads with indels           | 21,384             | 21,396             | 17,697             | 19,387             | 19,109             | 17,701             | 19,102             | 17,656             | 17,661             |
| Insertions                        | 9,452              | 9,459              | 7,489              | 8,433              | 8,357              | 7,494              | 8,353              | 7,475              | 7,477              |
| Deletions                         | 11,932             | 11,937             | 10,208             | 10,954             | 10,752             | 10,207             | 10,749             | 10,181             | 10,184             |
| Mean insert size                  | 198.75             | 198.75             | 198.33             | 198.16             | 198.14             | 198.33             | 198.15             | 198.04             | 198.04             |
| Median insert size                | 188                | 188                | 187                | 188                | 187                | 187                | 187                | 187                | 187                |
| Mapping runtime (mins)            | 0.98               | 0.96               | 0.88               | 1.06               | 0.76               | 0.83               | 0.78               | 0.73               | 0.75               |
