# Supplementary material for: Software for pre-processing Illumina next-generation sequencing short read sequences
Source: Springer Nature journal article supplement (doi:10.1186/1751-0473-9-8), 2014-05-03
Supplement: 13029_2013_109_MOESM3_ESM.pdf [file 13029_2013_109_MOESM3_ESM.pdf]

**Table SA5-1 Summary of *Caenorhabditis elegans* trimmed data generated by *ngsShoRT* algorithms and other tools**

| Method category                          | Adapter trimming                                      |                              |                                                                       |                                     | 3' end trimming   |                                    | Quality score based trimming |                          |                  |                                  |                                            |                                                      |
|------------------------------------------|-------------------------------------------------------|------------------------------|-----------------------------------------------------------------------|-------------------------------------|-------------------|------------------------------------|------------------------------|--------------------------|------------------|----------------------------------|--------------------------------------------|------------------------------------------------------|
|                                          | ngsShoRT (v 2.1)                                      | NGS QC Toolkit (v 2.3.2)     | Trimmomatic (v 0.32)                                                  | cutAdpt (v 1.3)                     | ngsShoRT (v 2.1)  | NGS QC Toolkit (v 2.3.2)           | ngsShoRT (v 2.1)             | ngsShoRT (v 2.1)         | ngsShoRT (v 2.1) | NGS QC Toolkit (v 2.3.2)         | NGS QC Toolkit (v 2.3.2)                   | Trimmomatic (v 0.32)                                 |
| <b>Tools</b>                             | ngsShoRT (v 2.1)                                      | NGS QC Toolkit (v 2.3.2)     | Trimmomatic (v 0.32)                                                  | cutAdpt (v 1.3)                     | ngsShoRT (v 2.1)  | NGS QC Toolkit (v 2.3.2)           | ngsShoRT (v 2.1)             | ngsShoRT (v 2.1)         | ngsShoRT (v 2.1) | NGS QC Toolkit (v 2.3.2)         | NGS QC Toolkit (v 2.3.2)                   | Trimmomatic (v 0.32)                                 |
| <b>DataSet</b>                           | 1_Sadpt                                               | 1_Sadpt                      | 1_illuminaAdpt                                                        | 1_cutAdpt                           | 3_3end            | 2_3end                             | 2_TERA                       | 4_LQR                    | 5_Mott           | 3_LQR                            | 4_qualCutoff                               | 2_slidingWindow                                      |
| <b># threads</b>                         | 32                                                    | 32                           | 32                                                                    | 1                                   | 32                | 1                                  | 32                           | 32                       | 32               | 32                               | 1                                          | 32                                                   |
| <b>Trimming algorithm</b>                | Sadpt                                                 | IlluQC.pl (adapter trimming) | ILLUMINACLIP                                                          | Global removal of adapter sequences | 3end              | TrimmingReads.pl (3' end trimming) | tera                         | lqr                      | mott             | IlluQC.pl (Low quality trimming) | TrimmingReads.pl (Quality cutoff trimming) | SLIDINGWINDOW                                        |
| <b>Trimming algorithm parameters</b>     | mrl: 21, list=Illumina adapter, action = ka, mp = 100 | 2 A -p 32                    | PE -threads 32 -phred33 ILLUMINACLIP:pe_pattern.fa :2:30:12 MINLEN:21 | -m 21 -b <adapter sequences>        | mrl: 21, x=10     | -n 21 -r 5                         | mrl: 21, avg = 2             | mrl: 21, lqs = 4, p = 50 | mrl: 21, ml=0.6  | N A -l 50 2 -p 32                | -n 21 -q 2                                 | PE -threads 32 -phred33 SLIDINGWINDOW:10:2 MINLEN:21 |
| <b>Mean Phred quality score</b>          | 29.53                                                 | 31.37                        | 29.55                                                                 | 29.58                               | 30.33             | 29.95                              | 31.57                        | 30.55                    | 31.57            | 30.64                            | 29.51                                      | 29.53                                                |
| <b>Low Phred quality score (&lt;=10)</b> | 1,899,444 (2.81%)                                     | 0 (0.00%)                    | 1,894,826 (2.80%)                                                     | 1905212 (2.82%)                     | 1,741,324 (2.58%) | 1,815,074 (2.68%)                  | 835,813 (1.24%)              | 256 (0.00%)              | 835825 (1.24%)   | 0 (0.00%)                        | 1,874,272 (2.77%)                          | 1,808,179 (2.68%)                                    |
| <b>Total runtime (mins)</b>              | 23.51                                                 | 667.78                       | 41                                                                    | 325.52                              | 14.76             | 18.9                               | 18.31                        | 18.58                    | 24.65            | 449.22                           | 35.05                                      | 39.5                                                 |
| <b>Peak thread runtime (mins)</b>        | 9.35                                                  | NA                           | NA                                                                    | NA                                  | 6.05              | NA                                 | 8.05                         | 8.58                     | 15.31            | NA                               | NA                                         | NA                                                   |
| <b>Merging runtime (mins)</b>            | 14.03                                                 | NA                           | NA                                                                    | NA                                  | 8.6               | NA                                 | 10.18                        | 10.18                    | 9.21             | NA                               | NA                                         | NA                                                   |
| <b>Peak RAM usage (MB)</b>               | 84.5                                                  | 15.55                        | 11460.72                                                              | 6.66                                | 81.87             | 3.95                               | 83.17                        | 83.42                    | 85.12            | 15.5                             | 3.95                                       | 3.96                                                 |
| <b>Total sequences (paired)</b>          | 33,804,923                                            | 27,481,664                   | 33,802,324                                                            | 33,806,467                          | 33,808,546        | 33,808,546                         | 33,808,546                   | 31,136,730               | 33,808,546       | 30,895,102                       | 33,787,215                                 | 33,752,156                                           |
| <b>Total bases (paired)</b>              | 6,727,619,415                                         | 5,496,332,800                | 6,713,730,648                                                         | 6,645,464,603                       | 6,085,538,280     | 6,423,623,740                      | 6,198,092,855                | 6,227,346,000            | 6,198,004,714    | 6,179,020,400                    | 6,756,628,181                              | 6,747,516,571                                        |
| <b>Total sequences (single)</b>          | 2,748                                                 | 4,510,854                    | 4,634                                                                 | 0                                   | 0                 | 0                                  | 0                            | 2,103,478                | 0                | 2,201,411                        | 0                                          | 56,242                                               |
| <b>Total bases (single)</b>              | 274,511                                               | 451,085,400                  | 461,220                                                               | 0                                   | 0                 | 0                                  | 0                            | 210,347,800              | 0                | 220,141,100                      | 0                                          | 4,552,569                                            |
| <b>Total bases</b>                       | 6,727,893,926                                         | 5,947,418,200                | 6,714,191,868                                                         | 6,645,464,603                       | 6,085,538,280     | 6,423,623,740                      | 6,198,092,855                | 6,437,693,800            | 6,198,004,714    | 6,399,161,500                    | 6,756,628,181                              | 6,752,069,140                                        |

**Table SA5-2 Summary of *Saccharomyces cerevisiae* S288c trimmed data generated by ngsShoRT algorithms and other tools**

| Method category                | Adapter trimming                                      |                  |                                                      |                                     | 3' end trimming |                  | Quality score based trimming |                          |                  |                   |                                            |                                                      |
|--------------------------------|-------------------------------------------------------|------------------|------------------------------------------------------|-------------------------------------|-----------------|------------------|------------------------------|--------------------------|------------------|-------------------|--------------------------------------------|------------------------------------------------------|
|                                | Tools                                                 | ngsShoRT (v 2.1) | NGS QC Toolkit (v 2.3.2)                             | Trimmomatic (v 0.32)                | cutAdpt (v 1.3) | ngsShoRT (v 2.1) | NGS QC Toolkit (v 2.3.2)     | ngsShoRT (v 2.1)         | ngsShoRT (v 2.1) | ngsShoRT (v 2.1)  | NGS QC Toolkit (v 2.3.2)                   | NGS QC Toolkit (v 2.3.2)                             |
| DataSet                        | 1 5adpt                                               | 1 5adpt          | 1 illuminaAdpt                                       | 1 cutAdpt                           | 3 3end          | 2 3end           | 2 TERA                       | 4 LQR                    | 5 Mott           | 3 LQR             | 4 qualCutoff                               | 2 slidingWindow                                      |
| # threads                      | 32                                                    | 32               | 32                                                   | 1                                   | 32              | 1                | 32                           | 32                       | 32               | 32                | 1                                          | 32                                                   |
| Trimming algorithm             | 5adpt                                                 | lluQC.pl         | ILLUMINACLIP                                         | Global removal of adapter sequences | 3end            | TrimmingReads.pl | tera                         | lqr                      | mott             | lluQC.pl          | TrimmingReads.pl (Quality cutoff trimming) | SLIDINGWINDOW                                        |
| Trimming algorithm parameters  | mrl: 21, list=illumina adapter, action = ka, mp = 100 | 2 A -p 32        | PE -threads 32 -phred33 ILLUMINACLIP:pe _pattern.fa: | -m 21 -b <adapter sequences>        | mrl: 21, x=10   | -n 21 -r 5       | mrl: 21, avg = 2             | mrl: 21, lqs = 4, p = 50 | mrl: 21, ml=0.6  | N A -l 50 2 -p 32 | -n 21 -q 2                                 | PE -threads 32 -phred33 SLIDINGWINDOW:10:2 MINLEN:21 |
| Mean Phred quality score       | 34.18                                                 | 36.34            | 34.22                                                | 34.23                               | 34.63           | 34.43            | 35.08                        | 35.86                    | 35               | 35.95             | 34.17                                      | 34.2                                                 |
| Low Phred quality score (<=10) | 167,587 (4.42%)                                       | 0 (0.00%)        | 165,289 (4.38%)                                      | 165,830 (4.39%)                     | 159,108 (4.19%) | 163,289 (4.30%)  | 119,114 (3.14%)              | 4 (0.00%)                | 119,114 (3.14%)  | 0 (0.00%)         | 167,669 (4.42%)                            | 164,832 (4.34%)                                      |
| Total runtime (mins)           | 1.45                                                  | 30.9             | 2.25                                                 | 30.3                                | 0.93            | 1.15             | 1.01                         | 1.08                     | 1.42             | 19.52             | 1.55                                       | 2.52                                                 |
| Peak thread runtime (mins)     | 0.7                                                   | NA               | NA                                                   | NA                                  | 0.4             | NA               | 0.45                         | 0.53                     | 0.88             | NA                | NA                                         | NA                                                   |
| Merging runtime (mins)         | 0.7                                                   | NA               | NA                                                   | NA                                  | 0.53            | NA               | 0.56                         | 0.55                     | 0.53             | NA                | NA                                         | NA                                                   |
| Peak RAM usage (MB)            | 82.43                                                 | 15.33            | 10237.7266                                           | 6.39                                | 81.7            | 3.95             | 81.78                        | 84.12                    | 81.91            | 15.27             | 3.95                                       | 7287.738                                             |
| Total sequences (paired)       | 1,894,251                                             | 1,666,403        | 1,885,399                                            | 1,889,919                           | 1,898,259       | 1,898,259        | 1,898,259                    | 1,740,787                | 1,898,259        | 1,731,604         | 1,898,259                                  | 1,896,133                                            |
| Total bases (paired)           | 287,920,526                                           | 253,293,256      | 286,566,814                                          | 283,553,600                         | 250,570,188     | 269,552,778      | 272,556,467                  | 264,599,624              | 272,556,067      | 263,203,808       | 288,535,368                                | 288,127,853                                          |
| Total sequences (single)       | 4,008                                                 | 146,285          | 5,005                                                | 0                                   | 0               | 0                | 0                            | 102,619                  | 0                | 104,871           | 0                                          | 1,867                                                |
| Total bases (single)           | 304,608                                               | 11,117,660       | 380,380                                              | 0                                   | 0               | 0                | 0                            | 7,799,044                | 0                | 7,970,196         | 0                                          | 134,767                                              |
| Total bases                    | 288,225,134                                           | 264,410,916      | 286,947,194                                          | 283,553,600                         | 250,570,188     | 269,552,778      | 272,556,467                  | 272,398,668              | 272,556,067      | 271,174,004       | 288,535,368                                | 288,262,620                                          |

**Table SA5-3 Summary of *Escherichia coli* O157 H7 trimmed data generated by ngsShoRT algorithms and other tools**

| Method category                | Adapter trimming                                      |                          |                                                                      |                                     | 3' end trimming  |                          | Quality score based trimming |                          |                  |                          |                                            |                                                       |
|--------------------------------|-------------------------------------------------------|--------------------------|----------------------------------------------------------------------|-------------------------------------|------------------|--------------------------|------------------------------|--------------------------|------------------|--------------------------|--------------------------------------------|-------------------------------------------------------|
| Tools                          | ngsShoRT (v 2.1)                                      | NGS QC Toolkit (v 2.3.2) | Trimmomatic (v 0.32)                                                 | cutAdpt (v 1.3)                     | ngsShoRT (v 2.1) | NGS QC Toolkit (v 2.3.2) | ngsShoRT (v 2.1)             | ngsShoRT (v 2.1)         | ngsShoRT (v 2.1) | NGS QC Toolkit (v 2.3.2) | NGS QC Toolkit (v 2.3.2)                   | Trimmomatic (v 0.32)                                  |
| DataSet                        | 1_5adpt                                               | 1_5adpt                  | 1_illuminaAdpt                                                       | 1_cutAdpt                           | 3_3end           | 2_3end                   | 2_TERA                       | 4_LQR                    | 5_Mott           | 3_LQR                    | 4_qualCutoff                               | 2_slidingWindow                                       |
| # threads                      | 32                                                    | 32                       | 32                                                                   | 1                                   | 32               | 1                        | 32                           | 32                       | 32               | 32                       | 1                                          | 32                                                    |
| Trimming algorithm             | 5adpt                                                 | lluQC.pl                 | ILLUMINACLIP                                                         | Global removal of adapter sequences | 3end             | TrimmingReads.pl         | tera                         | lqr                      | mott             | lluQC.pl                 | TrimmingReads.pl (Quality cutoff trimming) | SLIDINGWINDOW                                         |
| Trimming algorithm parameters  | mrl: 21, list=Illumina adapter, action = ka, mp = 100 | 2 A -p 32                | PE -threads 32 -phred33 ILLUMINACLIP:pe_pattern.fa:2:30:12 MINLEN:21 | -m 21 -b <adapter sequences>        | mrl: 21, x=10    | -n 21 -r 5               | mrl: 21, avg = 2             | mrl: 21, lqs = 4, p = 50 | mrl: 21, ml=0.6  | N A -l 50 2 -p 32        | -n 21 -q 2                                 | PE -threads 32 -phred33 SLIDINGWINDOW:1 0.2 MINLEN:21 |
| Mean Phred quality score       | 33.14                                                 | 34.32                    | 33.16                                                                | 33.21                               | 33.5             | 33.12                    | 34.17                        | 33.85                    | 34.17            | 34.5                     | 33.31                                      | 33.16                                                 |
| Low Phred quality score (<=10) | 76,569 (1.71%)                                        | 0 (0.00%)                | 76,389 (1.70%)                                                       | 76,291 (1.70%)                      | 69,820 (1.56%)   | 76,598 (1.71%)           | 10,492 (0.23%)               | 0 (0.00%)                | 10492 (0.23%)    | 0 (0.0%)                 | 73,257 (1.63%)                             | 69,856 (1.56%)                                        |
| Total runtime (mins)           | 1.9                                                   | 58.65                    | 2.5                                                                  | 27.35                               | 1.25             | 1.67                     | 1.43                         | 1.53                     | 2.25             | 43.83                    | 3.18                                       | 2.62                                                  |
| Peak thread runtime (mins)     | 0.9                                                   | NA                       | NA                                                                   | NA                                  | 0.52             | NA                       | 0.67                         | 0.78                     | 1.51             | NA                       | NA                                         | NA                                                    |
| Merging runtime (mins)         | 0.98                                                  | NA                       | NA                                                                   | NA                                  | 0.73             | NA                       | 0.76                         | 0.73                     | 0.71             | NA                       | NA                                         | NA                                                    |
| Peak RAM usage (MB)            | 82.09                                                 | 16.09                    | 10324.88                                                             | 6.39                                | 83.48            | 83.44                    | 82.76                        | 82.95                    | 84.98            | 16.02                    | 3.86                                       | 9525.95                                               |
| Total sequences (paired)       | 2,241,777                                             | 1,996,174                | 2,241,736                                                            | 2,241,777                           | 2,241,778        | 2,241,778                | 2,241,778                    | 2,113,808                | 2,241,778        | 2,098,815                | 2,241,778                                  | 2,240,861                                             |
| Total bases (paired)           | 670,699,844                                           | 598,852,200              | 668,304,902                                                          | 661,536,106                         | 627,697,840      | 650,115,620              | 646,423,163                  | 634,142,400              | 646,418,288      | 629,644,500              | 672,533,400                                | 671,174,112                                           |
| Total sequences (single)       | 1                                                     | 209,785                  | 41                                                                   | 0                                   | 0                | 0                        | 0                            | 118,827                  | 0                | 129,472                  | 0                                          | 917                                                   |
| Total bases (single)           | 150                                                   | 31,467,750               | 6,088                                                                | 0                                   | 0                | 0                        | 0                            | 17,824,050               | 0                | 19,420,800               | 0                                          | 100,953                                               |
| Total bases                    | 670,699,994                                           | 630,319,950              | 668,310,990                                                          | 661,536,106                         | 627,697,840      | 650,115,620              | 646,423,163                  | 651,966,450              | 646,418,288      | 649,065,300              | 672,533,400                                | 671,275,065                                           |

**Table SA6-1 Summary of *Caenorhabditis elegans de novo* genome assemblies of raw and trimmed data generated by *ngsShoRT* algorithms and other tools**

| Method category                    | Raw              | Adapter trimming |                          |                      |                  | 3' end trimming  |                          | Quality score based trimming |                  |                  |                          |                          |                      |
|------------------------------------|------------------|------------------|--------------------------|----------------------|------------------|------------------|--------------------------|------------------------------|------------------|------------------|--------------------------|--------------------------|----------------------|
| Tools                              | NA               | ngsShoRT (v 2.1) | NGS QC Toolkit (v 2.3.2) | Trimmomatic (v 0.32) | cutAdpt (v 1.3)  | ngsShoRT (v 2.1) | NGS QC Toolkit (v 2.3.2) | ngsShoRT (v 2.1)             | ngsShoRT (v 2.1) | ngsShoRT (v 2.1) | NGS QC Toolkit (v 2.3.2) | NGS QC Toolkit (v 2.3.2) | Trimmomatic (v 0.32) |
| DataSet                            | raw              | 1_5adpt          | 1_5adpt                  | 1_illuminaAdpt       | 1_cutAdpt        | 3_3end           | 2_3end                   | 2_TERA                       | 4_LQR            | 5_Mott           | 3_LQR                    | 4_qualCutoff             | 2_slidingWindow      |
| <b>VelvetOptimiser K-mer range</b> | 21 to 71, step 2 | 21 to 71, step 2 | 21 to 71, step 2         | 21 to 71, step 2     | 21 to 71, step 2 | 21 to 71, step 2 | 21 to 71, step 2         | 21 to 71, step 2             | 21 to 71, step 2 | 21 to 71, step 2 | 21 to 71, step 2         | 21 to 71, step 2         | 21 to 71, step 2     |
| <b>Optimal K-mer</b>               | 59               | 57               | 59                       | 53                   | 59               | 55               | 53                       | 53                           | 59               | 53               | 55                       | 57                       | 57                   |
| <b>Total contigs length (bp)</b>   | 99,712,970       | 100,450,601      | 100,516,903              | 100,083,943          | 100,617,975      | 100,319,545      | 100,100,171              | 100,071,634                  | 100,597,965      | 100,060,740      | 100,251,062              | 100,453,705              | 100,445,418          |
| <b>Total # contigs</b>             | 10,789           | 10,404           | 11,821                   | 10,481               | 10,522           | 10,383           | 10,393                   | 10,776                       | 10,549           | 10,755           | 10,539                   | 10,434                   | 10,443               |
| <b>Max contig length (bp)</b>      | 242,599          | 313,669          | 198,439                  | 288,459              | 305,200          | 246,594          | 283,307                  | 354,328                      | 313,984          | 354,102          | 391,230                  | 313,681                  | 315,260              |
| <b>E-size (bp)</b>                 | 45,484           | 51,429           | 39,829                   | 49,851               | 51,336           | 49,483           | 49,758                   | 47,096                       | 50,183           | 47,424           | 50,016                   | 50,517                   | 51,663               |
| <b>N25 (bp)</b>                    | 62,833           | 67,636           | 54,706                   | 68,575               | 69,166           | 66,635           | 68,867                   | 62,934                       | 67,555           | 63,244           | 66,536                   | 68,297                   | 68,359               |
| <b>N50 (bp)</b>                    | 32,064           | 35,124           | 28,149                   | 33,826               | 34,877           | 34,566           | 34,105                   | 32,417                       | 34,320           | 32,509           | 33,425                   | 34,979                   | 34,786               |
| <b>N75 (bp)</b>                    | 14,163           | 15,640           | 12,839                   | 15,492               | 15,638           | 15,704           | 15,561                   | 14,589                       | 15,429           | 14,684           | 15,228                   | 15,649                   | 15,569               |
| <b>N90 (bp)</b>                    | 5,637            | 6,187            | 5,101                    | 6,035                | 6,153            | 6,093            | 6,028                    | 5,709                        | 6,059            | 5,713            | 6,034                    | 6,177                    | 6,183                |
| <b>GC content (%)</b>              | 35.78            | 35.88            | 35.83                    | 35.9                 | 35.86            | 35.86            | 35.89                    | 35.8                         | 35.86            | 35.8             | 35.88                    | 35.88                    | 35.88                |
| <b>Velvet runtime (mins)</b>       | 13.85            | 13.76            | 8.93                     | 11.38                | 10.75            | 10.76            | 12.01                    | 11.23                        | 10.35            | 11.5             | 10.18                    | 11.97                    | 12.47                |
| <b>Velvet peak RAM usage (MB)</b>  | 33292.17         | 41054.26         | 20001.48                 | 32008.74             | 29993.23         | 26148.76         | 30176.66                 | 16867.36                     | 23361.7          | 31367.98         | 26521.99                 | 33672.33                 | 33508.42             |
| <b>Velvetg runtime (mins)</b>      | 34.18            | 31.91            | 49.76                    | 32.93                | 30.45            | 31.52            | 31.93                    | 31.67                        | 32.06            | 33.8             | 36.93                    | 32.1                     | 53.13                |
| <b>Velvetg peak RAM usage (MB)</b> | 16227.09         | 16250.76         | 13239.32                 | 18484.9              | 14749.03         | 15487.39         | 17919.77                 | 15450.44                     | 15064.87         | 15305.32         | 14289.68                 | 14888.89                 | 15070.54             |
| <b>Velvet runtime (mins)</b>       | 48.03            | 45.67            | 58.69                    | 44.31                | 41.2             | 42.28            | 43.94                    | 42.9                         | 42.41            | 45.3             | 47.11                    | 44.07                    | 65.6                 |
| <b>Velvet peak RAM usage (MB)</b>  | 49519.26         | 57305.02         | 33240.8                  | 50493.64             | 44742.26         | 41636.15         | 48096.43                 | 32317.8                      | 38426.57         | 46673.3          | 40811.67                 | 48561.22                 | 48578.96             |

**Table SA6-2 Summary of *Saccharomyces cerevisiae* S288c de novo genome assemblies of raw and trimmed data generated by ngsShoRT algorithms and other tools**

| Method category                    | Raw              | Adapter trimming |                          |                      |                  | 3' end trimming  |                          | Quality score based trimming |                  |                  |                          |                          |                      |
|------------------------------------|------------------|------------------|--------------------------|----------------------|------------------|------------------|--------------------------|------------------------------|------------------|------------------|--------------------------|--------------------------|----------------------|
|                                    |                  | ngsShoRT (v 2.1) | NGS QC Toolkit (v 2.3.2) | Trimmomatic (v 0.32) | cutAdpt (v 1.3)  | ngsShoRT (v 2.1) | NGS QC Toolkit (v 2.3.2) | ngsShoRT (v 2.1)             | ngsShoRT (v 2.1) | ngsShoRT (v 2.1) | NGS QC Toolkit (v 2.3.2) | NGS QC Toolkit (v 2.3.2) | Trimmomatic (v 0.32) |
| <b>DataSet</b>                     | raw              | 1 5adpt          | 1 5adpt                  | 1 illuminaAdpt       | 1 cutAdpt        | 3 3end           | 2 3end                   | 2 TERA                       | 4 LQR            | 5 Mott           | 3 LQR                    | 4 qualCutoff             | 2 slidingWindow      |
| <b>VelvetOptimiser K-mer range</b> | 21 to 71, step 2 | 21 to 71, step 2 | 21 to 71, step 2         | 21 to 71, step 2     | 21 to 71, step 2 | 21 to 71, step 2 | 21 to 71, step 2         | 21 to 71, step 2             | 21 to 71, step 2 | 21 to 71, step 2 | 21 to 71, step 2         | 21 to 71, step 2         | 21 to 71, step 2     |
| <b>Optimal K-mer</b>               | 31               | 31               | 33                       | 33                   | 31               | 31               | 29                       | 33                           | 31               | 33               | 31                       | 33                       | 33                   |
| <b>Total contigs length (bp)</b>   | 11,459,063       | 11,458,557       | 11,468,932               | 11470657             | 11457918         | 11,453,735       | 11,440,356               | 11,471,167                   | 11,459,492       | 11,471,030       | 11459931                 | 11470835                 | 11470167             |
| <b>Total # contigs</b>             | 1097             | 1,032            | 1,124                    | 1035                 | 1040             | 1,135            | 1,054                    | 1,057                        | 1,053            | 1,057            | 1053                     | 1037                     | 1037                 |
| <b>Max contig length (bp)</b>      | 101,217          | 123,093          | 102,644                  | 102660               | 106888           | 95,726           | 117,730                  | 102,654                      | 102,663          | 102,654          | 102663                   | 102660                   | 102653               |
| <b>E-size (bp)</b>                 | 27,917           | 32,412           | 28,109                   | 32,113               | 31,853           | 28,027           | 30,761                   | 30,607                       | 31,744           | 30,610           | 31,886                   | 31,661                   | 31,853               |
| <b>N25 (bp)</b>                    | 39,313           | 46,832           | 40,339                   | 47,012               | 46832            | 39,910           | 44,394                   | 45,306                       | 46,227           | 45,306           | 46,227                   | 46,188                   | 47,012               |
| <b>N50 (bp)</b>                    | 26,221           | 29,080           | 25,749                   | 30,443               | 29062            | 26,386           | 28,049                   | 28,539                       | 28,753           | 28,692           | 28,782                   | 30,443                   | 30,443               |
| <b>N75 (bp)</b>                    | 14,483           | 16,450           | 14,312                   | 16,395               | 16134            | 13,864           | 15,461                   | 15,439                       | 15,642           | 15,439           | 15,651                   | 16,114                   | 16,395               |
| <b>N90 (bp)</b>                    | 7,100            | 8,320            | 6,801                    | 8,207                | 8256             | 6,866            | 7,841                    | 7,384                        | 7,828            | 7,708            | 7,828                    | 8,207                    | 8,147                |
| <b>GC content (%)</b>              | 38.1             | 38.07            | 38.07                    | 38.07                | 38.07            | 38.06            | 38.08                    | 38.06                        | 38.08            | 38.06            | 38.08                    | 38.07                    | 38.07                |
| <b>Velvet runtime (mins)</b>       | 0.5              | 0.47             | 0.57                     | 0.58                 | 0.57             | 0.42             | 0.62                     | 0.42                         | 0.42             | 0.43             | 0.67                     | 0.62                     | 0.42                 |
| <b>Velvet peak RAM usage (MB)</b>  | 2386.38          | 1953.91          | 1,355.75                 | 1,937.99             | 1,920.93         | 1701.79          | 1,831.51                 | 1972.8                       | 1475.32          | 1972.27          | 1,453.19                 | 1,943.86                 | 2,512.92             |
| <b>Velvetg runtime (mins)</b>      | 1.58             | 1.62             | 1.55                     | 1.65                 | 1.7              | 1.45             | 1.73                     | 1.45                         | 1.52             | 1.5              | 1.63                     | 1.65                     | 1.65                 |
| <b>Velvetg peak RAM usage (MB)</b> | 1528.89          | 1541.94          | 1,368.63                 | 1,454.62             | 1,473.10         | 1401.07          | 1,446.17                 | 1457.18                      | 1474.82          | 1457.29          | 1,419.25                 | 1,463                    | 1,459.25             |
| <b>Velvet runtime (mins)</b>       | 2.08             | 2.09             | 2.12                     | 2.23                 | 2.27             | 1.87             | 2.35                     | 1.87                         | 1.94             | 1.93             | 2.30                     | 2.27                     | 2.07                 |
| <b>Velvet peak RAM usage (MB)</b>  | 3915.27          | 3495.85          | 2,724.38                 | 3,392.61             | 3,394.03         | 3,102.86         | 3,277.68                 | 3,429.98                     | 2,950.14         | 3,429.56         | 2,872.44                 | 3,406.86                 | 3,972.17             |

**Table SA6-3 Summary of *Escherichia coli* O157 H7 *de novo* genome assemblies of raw and trimmed data generated by *ngsShoRT* algorithms and other tools**

| Method category                    | Raw               | Adapter trimming  |                          |                      |                   | 3' end trimming   |                          | Quality score based trimming |                   |                   |                          |                          |                      |
|------------------------------------|-------------------|-------------------|--------------------------|----------------------|-------------------|-------------------|--------------------------|------------------------------|-------------------|-------------------|--------------------------|--------------------------|----------------------|
| Tools                              | NA                | ngsShoRT (v 2.1)  | NGS QC Toolkit (v 2.3.2) | Trimmomatic (v 0.32) | cutAdpt (v 1.3)   | ngsShoRT (v 2.1)  | NGS QC Toolkit (v 2.3.2) | ngsShoRT (v 2.1)             | ngsShoRT (v 2.1)  | ngsShoRT (v 2.1)  | NGS QC Toolkit (v 2.3.2) | NGS QC Toolkit (v 2.3.2) | Trimmomatic (v 0.32) |
| <b>DataSet</b>                     | raw               | 1 5adpt           | 1 5adpt                  | 1 illuminaAdpt       | 1 cutAdpt         | 3 3end            | 2 3end                   | 2 TERA                       | 4 LQR             | 5 Mott            | 3 LQR                    | 4 qualCutoff             | 2 slidingWindow      |
| <b>VelvetOptimiser K-mer range</b> | 21 to 101, step 2 | 21 to 101, step 2 | 21 to 101, step 2        | 21 to 101, step 2    | 21 to 101, step 2 | 21 to 101, step 2 | 21 to 101, step 2        | 21 to 101, step 2            | 21 to 101, step 2 | 21 to 101, step 2 | 21 to 101, step 2        | 21 to 101, step 2        | 21 to 101, step 2    |
| <b>Optimal K-mer</b>               | 65                | 83                | 101                      | 83                   | 73                | 61                | 71                       | 81                           | 63                | 53                | 89                       | 65                       | 83                   |
| <b>Total contigs length (bp)</b>   | 5,343,509         | 5,377,817         | 5,428,955                | 5,377,979            | 5,363,693         | 5,340,366         | 5,360,433                | 5,376,030                    | 5,343,371         | 5,318,483         | 5,388,881                | 5,346,357                | 5,377,774            |
| <b>Total # contigs</b>             | 417               | 429               | 565                      | 432                  | 425               | 413               | 416                      | 426                          | 415               | 413               | 453                      | 409                      | 431                  |
| <b>Max contig length (bp)</b>      | 440,689           | 440,768           | 351,081                  | 440,779              | 440,710           | 440,609           | 440,697                  | 440,755                      | 440,676           | 440,600           | 351,610                  | 440,690                  | 440,793              |
| <b>E-size (bp)</b>                 | 144,862           | 154,338           | 143,353                  | 153,376              | 155,305           | 1,534,555         | 157,673                  | 165,801                      | 148,206           | 152,471           | 149,461                  | 151,010                  | 154,318              |
| <b>N25 (bp)</b>                    | 206,077           | 201,538           | 215,147                  | 201,556              | 217,654           | 222,514           | 217,650                  | 269,539                      | 217,634           | 219,582           | 229,187                  | 217,638                  | 201,556              |
| <b>N50 (bp)</b>                    | 138,164           | 133,303           | 131,792                  | 133,303              | 132,682           | 145,318           | 145,338                  | 146,563                      | 133,173           | 145,302           | 146,666                  | 145,326                  | 132,899              |
| <b>N75 (bp)</b>                    | 55,036            | 58,448            | 63,079                   | 58,448               | 58,428            | 58,398            | 55,048                   | 65,903                       | 55,026            | 49,914            | 63,077                   | 58,406                   | 58,448               |
| <b>N90 (bp)</b>                    | 19,524            | 19,668            | 15,823                   | 19,668               | 19,540            | 21,340            | 21,352                   | 25,042                       | 21,336            | 20,376            | 25,058                   | 19,691                   | 19,668               |
| <b>GC content (%)</b>              | 50.24             | 50.24             | 50.27                    | 50.25                | 50.25             | 50.24             | 50.24                    | 50.25                        | 50.24             | 50.23             | 50.26                    | 50.24                    | 50.24                |
| <b>Velvet runtime (mins)</b>       | 0.82              | 0.8               | 0.8                      | 0.83                 | 0.87              | 0.83              | 0.88                     | 0.75                         | 0.83              | 0.86              | 0.92                     | 1.11                     | 0.72                 |
| <b>Velvet peak RAM usage (MB)</b>  | 3,039.85          | 2,823.38          | 1,999.16                 | 2,686.48             | 2,533.29          | 2,436.14          | 2,688.18                 | 2,921.06                     | 2,434.88          | 2,932.83          | 2,339.50                 | 3,042.05                 | 3,758.43             |
| <b>Velvetg runtime (mins)</b>      | 1.98              | 1.75              | 1.85                     | 1.85                 | 1.93              | 1.92              | 1.92                     | 1.72                         | 1.98              | 2.18              | 1.76                     | 2.11                     | 1.87                 |
| <b>Velvetg peak RAM usage (MB)</b> | 1,171.93          | 1,228.18          | 1,097.10                 | 1,158.04             | 1,147.50          | 1,159.11          | 1,097.08                 | 1,192.27                     | 1,203.38          | 1,383.91          | 1,122.10                 | 1,171.16                 | 1,159.04             |
| <b>Velvet runtime (mins)</b>       | 1.98              | 1.75              | 1.85                     | 1.85                 | 1.93              | 1.92              | 1.92                     | 1.72                         | 1.98              | 2.18              | 1.76                     | 2.11                     | 1.87                 |
| <b>Velvet peak RAM usage (MB)</b>  | 1,171.93          | 1,228.18          | 1,097.10                 | 1,158.04             | 1,147.50          | 1,159.11          | 1,097.08                 | 1,192.27                     | 1,203.38          | 1,383.91          | 1,122.10                 | 1,171.16                 | 1,159.04             |

**Table SA7-1 Correctness of *Caenorhabditis elegans* de novo genome assemblies of raw and trimmed data generated by ngsShoRT algorithms and other tools**

| Method category                       | Raw                 | Adapter trimming    |                          |                      |                     | 3' end trimming     |                          | Quality score based trimming |                     |                     |                          |                          |                      |
|---------------------------------------|---------------------|---------------------|--------------------------|----------------------|---------------------|---------------------|--------------------------|------------------------------|---------------------|---------------------|--------------------------|--------------------------|----------------------|
|                                       |                     | ngsShoRT (v 2.1)    | NGS QC Toolkit (v 2.3.2) | Trimmomatic (v 0.32) | cutAdpt (v 1.3)     | ngsShoRT (v 2.1)    | NGS QC Toolkit (v 2.3.2) | ngsShoRT (v 2.1)             | ngsShoRT (v 2.1)    | ngsShoRT (v 2.1)    | NGS QC Toolkit (v 2.3.2) | NGS QC Toolkit (v 2.3.2) | Trimmomatic (v 0.32) |
| <b>DataSet</b>                        | raw                 | 1 5adpt             | 1 5adpt                  | 1 illuminaAdpt       | 1 cutAdpt           | 3 3end              | 2 3end                   | 2 TERA                       | 4 LQR               | 5 Mott              | 3 LQR                    | 4 qualCutoff             | 2 slidingWindow      |
| <b>Reference genome size</b>          | 100,286,401         | 100,286,401         | 100,286,401              | 100,286,401          | 100,286,401         | 100,286,401         | 100,286,401              | 100,286,401                  | 100,286,401         | 100,286,401         | 100,286,401              | 100,286,401              | 100,286,401          |
| <b>Reference genome coverage</b>      | 98,403,841 (98.12%) | 98,822,655 (98.54%) | 98,814,916 (98.53%)      | 98,488,217 (98.21%)  | 98,929,553 (98.65%) | 98,669,067 (98.39%) | 98,509,256 (98.23%)      | 98,392,719 (98.11%)          | 98,939,675 (98.66%) | 98,393,760 (98.11%) | 98,640,366 (98.36%)      | 98,842,219 (98.56%)      | 98,841,872 (98.56%)  |
| <b>Total contigs</b>                  | 10,789              | 10,404              | 11,821                   | 10,481               | 10,522              | 10,352              | 10,393                   | 10,776                       | 10,549              | 10,755              | 10,539                   | 10,434                   | 10,443               |
| <b>Aligned contigs</b>                | 10,569 (97.96%)     | 10,242 (98.44%)     | 11,497 (97.26%)          | 10,332 (98.58%)      | 10,365 (98.51%)     | 10,185 (98.39%)     | 10,234 (98.47%)          | 10,611 (98.47%)              | 10,387 (98.46%)     | 10,590 (98.47%)     | 10,383 (98.52%)          | 10,270 (98.43%)          | 10,283 (98.47%)      |
| <b>Avg identity (%) (1-1 mapping)</b> | 99.96               | 99.96               | 99.95                    | 99.95                | 99.96               | 99.95               | 99.95                    | 99.94                        | 99.96               | 99.94               | 99.95                    | 99.95                    | 99.95                |
| <b>Avg identity (%) (m-m mapping)</b> | 99.85               | 99.85               | 99.85                    | 99.85                | 99.85               | 99.85               | 99.85                    | 99.84                        | 99.85               | 99.84               | 99.85                    | 99.85                    | 99.85                |
| <b>TotalSNPs</b>                      | 9,140               | 9,868               | 8,537                    | 10,738               | 9,088               | 9,358               | 10,362                   | 9,860                        | 8,882               | 9,717               | 9,558                    | 9,645                    | 9,539                |

**Table SA7-2 Correctness of *Saccharomyces cerevisiae* S288c de novo genome assemblies of raw and trimmed data generated by ngsShoRT algorithms and other tools**

| Method category                       | Raw                 | Adapter trimming    |                          |                      |                     | 3' end trimming     |                          | Quality score based trimming |                     |                     |                          |                          |                      |
|---------------------------------------|---------------------|---------------------|--------------------------|----------------------|---------------------|---------------------|--------------------------|------------------------------|---------------------|---------------------|--------------------------|--------------------------|----------------------|
| Tools                                 | NA                  | ngsShoRT (v 2.1)    | NGS QC Toolkit (v 2.3.2) | Trimmomatic (v 0.32) | cutAdpt (v 1.3)     | ngsShoRT (v 2.1)    | NGS QC Toolkit (v 2.3.2) | ngsShoRT (v 2.1)             | ngsShoRT (v 2.1)    | ngsShoRT (v 2.1)    | NGS QC Toolkit (v 2.3.2) | NGS QC Toolkit (v 2.3.2) | Trimmomatic (v 0.32) |
| <b>DataSet</b>                        | raw                 | 1 5adpt             | 1 5adpt                  | 1 illuminaAdpt       | 1 cutAdpt           | 3 3end              | 2 3end                   | 2 TERA                       | 4 LQR               | 5 Mott              | 3 LQR                    | 4 qualCutoff             | 2 slidingWindow      |
| <b>Reference genome size</b>          | 12,157,105          | 12,157,105          | 12,157,105               | 12,157,105           | 12,157,105          | 12,157,105          | 12,157,105               | 12,157,105                   | 12,157,105          | 12,157,105          | 12,157,105               | 12,157,105               | 12,157,105           |
| <b>Reference genome coverage</b>      | 11,738,621 (96.56%) | 11,761,633 (96.75%) | 11,809,050 (97.14%)      | 11,781,549 (96.91%)  | 11,766,257 (96.79%) | 11,734,644 (96.52%) | 11,731,863 (96.50%)      | 11,806,630 (97.12%)          | 11,789,294 (96.97%) | 11,807,310 (97.12%) | 11,791,068 (96.99%)      | 11,774,280 (96.85%)      | 11,775,741 (96.86%)  |
| <b>Total contigs</b>                  | 1,097               | 1,032               | 1,124                    | 1,035                | 1,040               | 1,135               | 1,054                    | 1,057                        | 1,053               | 1,057               | 1,053                    | 1,037                    | 1,037                |
| <b>Aligned contigs</b>                | 1,090 (99.36%)      | 1,018 (98.64%)      | 1,116 (99.29%)           | 1,023 (98.84%)       | 1,027 (98.75%)      | 1,114 (98.15%)      | 1,039 (98.58%)           | 1,050 (99.34%)               | 1,041 (98.86%)      | 1,050 (99.34%)      | 1,041 (98.86%)           | 1,025 (98.84%)           | 1,025 (98.84%)       |
| <b>Avg identity (%) (1-1 mapping)</b> | 99.96               | 99.97               | 99.97                    | 99.97                | 99.97               | 99.95               | 99.97                    | 99.96                        | 99.97               | 99.96               | 99.98                    | 99.97                    | 99.97                |
| <b>Avg identity (%) (m-m mapping)</b> | 99.95               | 99.95               | 99.95                    | 99.95                | 99.95               | 99.94               | 99.95                    | 99.94                        | 99.96               | 99.94               | 99.96                    | 99.95                    | 99.95                |
| <b>TotalSNPs</b>                      | 786                 | 730                 | 621                      | 729                  | 739                 | 781                 | 882                      | 598                          | 654                 | 602                 | 635                      | 713                      | 716                  |



**Table SA7-3 Correctness of *Escherichia coli* O157 H7 de novo genome assemblies of raw and trimmed data generated by ngsShoRT algorithms and other tools**

| Method category                | Raw              | Adapter trimming |                          |                      |                    | 3' end trimming  |                          | Quality score based trimming |                  |                  |                          |                          |                      |
|--------------------------------|------------------|------------------|--------------------------|----------------------|--------------------|------------------|--------------------------|------------------------------|------------------|------------------|--------------------------|--------------------------|----------------------|
| Tools                          | NA               | ngsShoRT (v 2.1) | NGS QC Toolkit (v 2.3.2) | Trimmomatic (v 0.32) | cutAdpt (v 1.3)    | ngsShoRT (v 2.1) | NGS QC Toolkit (v 2.3.2) | ngsShoRT (v 2.1)             | ngsShoRT (v 2.1) | ngsShoRT (v 2.1) | NGS QC Toolkit (v 2.3.2) | NGS QC Toolkit (v 2.3.2) | Trimmomatic (v 0.32) |
| DataSet                        | raw              | 1 5adpt          | 1 5adpt                  | 1 illuminaAdpt       | 1 cutAdpt          | 3 3end           | 2 3end                   | 2 TERA                       | 4 LQR            | 5 Mott           | 3 LQR                    | 4 qualCutoff             | 2 slidingWindow      |
| Reference genome size          | 5,498,450        | 5,498,450        | 5,498,450                | 5,498,450            | 5,498,450          | 5,498,450        | 5,498,450                | 5,498,450                    | 5,498,450        | 5,498,450        | 5,498,450                | 5,498,450                | 5,498,450            |
| Reference genome coverage      | 5363955 (97.55%) | 5384193 (97.92%) | 5,389,948 (98.03%)       | 5,384,971 (97.94%)   | 5,378,185 (97.81%) | 5361630 (97.51%) | 5,376,324 (97.78%)       | 5383225 (97.90%)             | 5366345 (97.60%) | 5336300 (97.05%) | 5,385,756 (97.95%)       | 5,365,800 (97.59%)       | 5,384,090 (97.92%)   |
| Total contigs                  | 417              | 429              | 565                      | 432                  | 425                | 413              | 416                      | 426                          | 415              | 413              | 453                      | 409                      | 431                  |
| Aligned contigs                | 409 (98.08%)     | 427 (99.53%)     | 563 (99.65%)             | 430 (99.54%)         | 420 (98.82%)       | 406 (98.31%)     | 411 (98.80%)             | 423 (99.30%)                 | 407 (98.07%)     | 401 (97.09%)     | 449 (99.12%)             | 401 (98.04%)             | 429 (99.54%)         |
| Avg identity (%) (1-1 mapping) | 99.95            | 99.95            | 99.96                    | 99.95                | 99.95              | 99.95            | 99.96                    | 99.95                        | 99.96            | 99.95            | 99.95                    | 99.95                    | 99.95                |
| Avg identity (%) (m-m mapping) | 99.9             | 99.89            | 99.9                     | 99.89                | 99.89              | 99.9             | 99.9                     | 99.9                         | 99.9             | 99.91            | 99.9                     | 99.89                    | 99.9                 |
| TotalSNPs                      | 1,859            | 1,929            | 1,758                    | 1,936                | 1,952              | 1,823            | 1,766                    | 1,899                        | 1,847            | 1,826            | 1,853                    | 1,815                    | 1912                 |

**Table SA8-1 Summary of *Caenorhabditis elegans* reference-based assemblies of raw and trimmed data generated by *ngsShoRT* algorithms and other tools**

| Method category                   | Raw                 | Adapter trimming    |                          |                      |                     | 3' end trimming     |                          | Quality score based trimming |                     |                     |                          |                          |                      |
|-----------------------------------|---------------------|---------------------|--------------------------|----------------------|---------------------|---------------------|--------------------------|------------------------------|---------------------|---------------------|--------------------------|--------------------------|----------------------|
| Tools                             | NA                  | ngsShoRT (v 2.1)    | NGS QC Toolkit (v 2.3.2) | Trimmomatic (v 0.32) | cutAdpt (v 1.3)     | ngsShoRT (v 2.1)    | NGS QC Toolkit (v 2.3.2) | ngsShoRT (v 2.1)             | ngsShoRT (v 2.1)    | ngsShoRT (v 2.1)    | NGS QC Toolkit (v 2.3.2) | NGS QC Toolkit (v 2.3.2) | Trimmomatic (v 0.32) |
| DataSet                           | raw                 | 1 5adpt             | 1 5adpt                  | 1 illuminaAdpt       | 1 cutAdpt           | 3 3end              | 2 3end                   | 2 TERA                       | 4 LQR               | 5 Mott              | 3 LQR                    | 4 qualCutoff             | 2 slidingWindow      |
| Reference genome size             | 100,286,401         | 100,286,401         | 100,286,401              | 100,286,401          | 100,286,401         | 100,286,401         | 100,286,401              | 100,286,401                  | 100,286,401         | 100,286,401         | 100,286,401              | 100,286,401              | 100,286,401          |
| Number of reads                   | 68,029,090          | 68,024,577          | 59,825,255               | 68,016,822           | 68,016,262          | 67,901,888          | 67,962,815               | 67,948,294                   | 64,751,598          | 67,948,294          | 64,363,972               | 67,986,333               | 68,003,303           |
| Mapped reads                      | 65,108,539 / 95.71% | 65,107,835 / 95.71% | 57,910,084 / 96.8%       | 65,107,158 / 95.72%  | 65,098,109 / 95.71% | 64,966,762 / 95.68% | 65,035,027 / 95.69%      | 64,580,965 / 95.04%          | 62,368,674 / 96.32% | 64,582,097 / 95.05% | 62,006,146 / 96.34%      | 65,087,939 / 95.74%      | 65,101,496 / 95.73%  |
| Unmapped reads                    | 2,920,551 / 4.29%   | 2,916,742 / 4.29%   | 1,915,171 / 3.2%         | 2,909,664 / 4.28%    | 2,918,153 / 4.29%   | 2,935,126 / 4.31%   | 2,927,788 / 4.31%        | 3,367,329 / 4.96%            | 2,382,924 / 3.68%   | 3,366,197 / 4.95%   | 2,357,826 / 3.66%        | 2,898,394 / 4.26%        | 2,901,807 / 4.27%    |
| Paired reads                      | 65,108,539 / 95.71% | 65,107,653 / 95.71% | 53,711,670 / 89.78%      | 65,106,978 / 95.72%  | 65,098,109 / 95.71% | 64,966,762 / 95.68% | 65,035,027 / 95.69%      | 64,580,965 / 95.04%          | 60,429,886 / 93.33% | 64,582,097 / 95.05% | 59,971,303 / 93.18%      | 65,087,939 / 95.74%      | 65,038,620 / 95.64%  |
| Mapped reads, only first in pair  | 32,603,951 / 47.93% | 32,603,560 / 47.93% | 26,850,278 / 44.88%      | 32,603,308 / 47.93%  | 32,599,886 / 47.93% | 32,535,473 / 47.92% | 32,568,229 / 47.92%      | 32,412,953 / 47.7%           | 30,206,558 / 46.65% | 32,414,026 / 47.7%  | 29,977,483 / 46.57%      | 32,583,640 / 47.93%      | 32,555,956 / 47.87%  |
| Mapped reads, only second in pair | 32,504,588 / 47.78% | 32,504,093 / 47.78% | 26,861,392 / 44.9%       | 32,503,670 / 47.79%  | 32,498,223 / 47.78% | 32,431,289 / 47.76% | 32,466,798 / 47.77%      | 32,168,012 / 47.34%          | 30,223,328 / 46.68% | 32,168,071 / 47.34% | 29,993,820 / 46.6%       | 32,504,299 / 47.81%      | 32,482,664 / 47.77%  |
| Mapped reads, both in pair        | 64,782,848 / 95.23% | 64,782,175 / 95.23% | 53,615,708 / 89.62%      | 64,781,797 / 95.24%  | 64,769,939 / 95.23% | 64,631,660 / 95.18% | 64,704,768 / 95.21%      | 64,044,875 / 94.26%          | 60,307,426 / 93.14% | 64,045,411 / 94.26% | 59,850,314 / 92.99%      | 64,782,266 / 95.29%      | 64,737,254 / 95.2%   |
| Mapped reads, singletons          | 325,691 / 0.48%     | 325,478 / 0.48%     | 95,962 / 0.16%           | 325,181 / 0.48%      | 328,170 / 0.48%     | 335,102 / 0.49%     | 330,259 / 0.49%          | 536,090 / 0.79%              | 122,460 / 0.19%     | 536,686 / 0.79%     | 120,989 / 0.19%          | 305,673 / 0.45%          | 301,366 / 0.44%      |
| Read min/max/mean length          | 30 / 100 / 99.64    | 21 / 100 / 99.15    | 30 / 100 / 99.65         | 21 / 100 / 98.95     | 21 / 100 / 99.94    | 30 / 90 / 89.78     | 30 / 95 / 94.71          | 21 / 100 / 91.41             | 30 / 100 / 99.65    | 21 / 100 / 91.41    | 30 / 100 / 99.65         | 21 / 100 / 99.62         | 21 / 100 / 99.56     |
| Clipped reads                     | 6,368,951 / 9.36%   | 5,746,286 / 8.45%   | 3,533,838 / 5.91%        | 5,327,811 / 7.83%    | 4,638,290 / 6.82%   | 4,881,239 / 7.19%   | 5,540,026 / 8.15%        | 3,555,657 / 5.23%            | 5,057,053 / 7.81%   | 3,552,831 / 5.23%   | 4,983,996 / 7.74%        | 6,361,176 / 9.36%        | 6,326,905 / 9.3%     |
| Duplication rate                  | 31.14%              | 31.22%              | 28.72%                   | 31.30%               | 34.78%              | 31.01%              | 31.07%                   | 30.99%                       | 30.33%              | 30.99%              | 30.19%                   | 31.13%                   | 31.16%               |
| GC (%)                            | 34.15%              | 34.15%              | 33.63%                   | 34.15%               | 34.17%              | 34.09%              | 34.12%                   | 33.74%                       | 33.98%              | 33.74%              | 33.97%                   | 34.15%                   | 34.15%               |
| Total reads with indels           | 521,946             | 522,212             | 339,285                  | 522,238              | 510,378             | 433,970             | 476,879                  | 330,934                      | 431,268             | 330,864             | 425,855                  | 521,979                  | 521,560              |
| Insertions                        | 211,101             | 211,200             | 132,628                  | 211,187              | 205,945             | 175,048             | 192,453                  | 129,093                      | 171,387             | 128,999             | 169,102                  | 211,039                  | 210,921              |
| Deletions                         | 310,845             | 311,012             | 206,657                  | 311,051              | 304,433             | 258,922             | 284,426                  | 201,841                      | 259,881             | 201,865             | 256,753                  | 310,940                  | 310,639              |
| Mean insert size                  | 244.42              | 244.27              | 244.69                   | 244.27               | 243.33              | 244.14              | 244.2                    | 243.48                       | 243.82              | 243.47              | 243.8                    | 244.26                   | 244.26               |
| Median insert size                | 252                 | 252                 | 251                      | 252                  | 251                 | 252                 | 252                      | 252                          | 251                 | 252                 | 251                      | 252                      | 252                  |
| Mapping runtime (mins)            | 16.35               | 16.72               | 10.3                     | 14.26                | 18.48               | 15.88               | 14.05                    | 15.8                         | 14.28               | 15.05               | 16.18                    | 16.28                    | 15.68                |

**Table SA8-2 Summary of *Saccharomyces cerevisiae* S288c reference-based assemblies of raw and trimmed data generated by *ngsShoRT* algorithms and other tools**

| Method category                   | Raw                | Adapter trimming   |                          |                      |                    | 3' end trimming    |                          | Quality score based trimming |                    |                    |                          |                          |                      |
|-----------------------------------|--------------------|--------------------|--------------------------|----------------------|--------------------|--------------------|--------------------------|------------------------------|--------------------|--------------------|--------------------------|--------------------------|----------------------|
| Tools                             | NA                 | ngsShoRT (v 2.1)   | NGS QC Toolkit (v 2.3.2) | Trimmomatic (v 0.32) | cutAdpt (v 1.3)    | ngsShoRT (v 2.1)   | NGS QC Toolkit (v 2.3.2) | ngsShoRT (v 2.1)             | ngsShoRT (v 2.1)   | ngsShoRT (v 2.1)   | NGS QC Toolkit (v 2.3.2) | NGS QC Toolkit (v 2.3.2) | Trimmomatic (v 0.32) |
| DataSet                           | raw                | 1 5adpt            | 1 illuminaAdpt           | 1 cutAdpt            | 3 3end             | 2 3end             | 2 TERA                   | 4 LQR                        | 5 Mott             | 3 LQR              | 4 qualCutoff             | 2 slidingWindow          |                      |
| Reference genome size             | 12,157,105         | 12,157,105         | 12,157,105               | 12,157,105           | 12,157,105         | 12,157,105         | 12,157,105               | 12,157,105                   | 12,157,105         | 12,157,105         | 12,157,105               | 12,157,105               |                      |
| Number of reads                   | 3,803,781          | 3,799,773          | 3,485,029                | 3,779,102            | 3,786,809          | 3,800,411          | 3,802,064                | 3,802,165                    | 3,590,603          | 3,802,165          | 3,574,433                | 3,803,781                | 3,800,270            |
| Mapped reads                      | 3,628,753 / 95.4%  | 3,628,737 / 95.5%  | 3,407,828 / 97.78%       | 3,628,584 / 96.02%   | 3,627,907 / 95.8%  | 3,623,766 / 95.35% | 3,626,324 / 95.38%       | 3,568,113 / 93.84%           | 3,498,316 / 97.43% | 3,568,113 / 93.84% | 3,484,370 / 97.48%       | 3,628,753 / 95.4%        | 3,625,582 / 95.4%    |
| Unmapped reads                    | 175,028 / 4.6%     | 171,036 / 4.5%     | 77,201 / 2.22%           | 150,518 / 3.98%      | 158,902 / 4.2%     | 176,645 / 4.65%    | 175,740 / 4.62%          | 234,052 / 6.16%              | 92,287 / 2.57%     | 234,052 / 6.16%    | 90,063 / 2.52%           | 175,028 / 4.6%           | 174,688 / 4.6%       |
| Paired reads                      | 3,628,753 / 95.4%  | 3,628,737 / 95.5%  | 3,276,439 / 94.01%       | 3,628,570 / 96.02%   | 3,627,907 / 95.8%  | 3,623,766 / 95.35% | 3,626,324 / 95.38%       | 3,568,113 / 93.84%           | 3,407,454 / 94.9%  | 3,568,113 / 93.84% | 3,391,062 / 94.87%       | 3,628,753 / 95.4%        | 3,625,166 / 95.39%   |
| Mapped reads, only first in pair  | 1,805,405 / 47.46% | 1,805,397 / 47.51% | 1,637,416 / 46.98%       | 1,805,373 / 47.77%   | 1,805,133 / 47.67% | 1,804,231 / 47.47% | 1,804,828 / 47.47%       | 1,778,833 / 46.78%           | 1,702,837 / 47.42% | 1,778,833 / 46.78% | 1,694,656 / 47.41%       | 1,805,405 / 47.46%       | 1,803,623 / 47.46%   |
| Mapped reads, only second in pair | 1,823,348 / 47.94% | 1,823,340 / 47.99% | 1,639,023 / 47.03%       | 1,823,197 / 48.24%   | 1,822,774 / 48.13% | 1,819,535 / 47.88% | 1,821,496 / 47.91%       | 1,789,280 / 47.06%           | 1,704,617 / 47.47% | 1,789,280 / 47.06% | 1,696,406 / 47.46%       | 1,823,348 / 47.94%       | 1,821,543 / 47.93%   |
| Mapped reads, both in pair        | 3,590,695 / 94.4%  | 3,590,679 / 94.5%  | 3,276,111 / 94.01%       | 3,590,643 / 95.01%   | 3,589,861 / 94.8%  | 3,586,298 / 94.37% | 3,588,624 / 94.39%       | 3,527,381 / 92.77%           | 3,406,934 / 94.88% | 3,527,381 / 92.77% | 3,390,614 / 94.86%       | 3,590,695 / 94.4%        | 3,587,326 / 94.4%    |
| Mapped reads, singletons          | 38,058 / 1%        | 38,058 / 1%        | 328 / 0.01%              | 37,927 / 1%          | 38,046 / 1%        | 37,468 / 0.99%     | 37,700 / 0.99%           | 40,732 / 1.07%               | 520 / 0.01%        | 40,732 / 1.07%     | 448 / 0.01%              | 38,058 / 1%              | 37,840 / 1%          |
| Read min/max/mean length          | 29 / 76 / 75.92    | 21 / 76 / 75.92    | 29 / 76 / 75.93          | 21 / 76 / 75.92      | 21 / 76 / 74.94    | 30 / 66 / 65.97    | 30 / 71 / 70.95          | 21 / 76 / 71.74              | 29 / 76 / 75.93    | 21 / 76 / 71.74    | 29 / 76 / 75.93          | 29 / 76 / 75.92          | 21 / 76 / 75.9       |
| Clipped reads                     | 143,865 / 3.78%    | 143,808 / 3.78%    | 76,646 / 2.2%            | 143,473 / 3.8%       | 109,205 / 2.88%    | 81,541 / 2.15%     | 104,632 / 2.75%          | 64,753 / 1.7%                | 93,103 / 2.59%     | 64,748 / 1.7%      | 91,018 / 2.55%           | 143,865 / 3.78%          | 142,320 / 3.74%      |
| Duplication rate                  | 15.08%             | 15.08%             | 14.31%                   | 15.07%               | 17.89%             | 14.70%             | 14.84%                   | 14.94%                       | 14.59%             | 14.94%             | 14.54%                   | 15.08%                   | 15.07%               |
| GC (%)                            | 39.11%             | 39.11%             | 38.98%                   | 39.11%               | 39.16%             | 39.08%             | 39.10%                   | 39.00%                       | 39.06%             | 39.00%             | 39.05%                   | 39.11%                   | 39.11%               |
| Total reads with indels           | 13,683             | 13,690             | 8,474                    | 13,678               | 13,081             | 10,925             | 12,272                   | 8,350                        | 10,756             | 8,352              | 10,534                   | 13,683                   | 13,654               |
| Insertions                        | 5,144              | 5,152              | 3,028                    | 5,145                | 4,892              | 3,934              | 4,611                    | 2,855                        | 3,951              | 2,853              | 3,858                    | 5,144                    | 5,131                |
| Deletions                         | 8,539              | 8,538              | 5,446                    | 8,533                | 8,189              | 6,991              | 7,661                    | 5,495                        | 6,805              | 5,499              | 6,676                    | 8,539                    | 8,523                |
| Mean insert size                  | 169.86             | 169.87             | 170.35                   | 169.85               | 168.97             | 169.79             | 169.79                   | 170.07                       | 170.12             | 170.06             | 170.15                   | 169.86                   | 169.84               |
| Median insert size                | 154                | 154                | 155                      | 154                  | 153                | 154                | 154                      | 154                          | 154                | 154                | 154                      | 154                      | 154                  |
| Mapping runtime (mins)            | 1.32               | 0.83               | 0.7                      | 0.67                 | 0.62               | 1.01               | 0.57                     | 0.93                         | 0.68               | 1.36               | 0.52                     | 0.87                     | 0.72                 |

**Table SA8-3 Summary of *Escherichia coli* O157 H7 reference-based assemblies of raw and trimmed data generated by *ngsShoRT* algorithms and other tools**

| Method category                   | Raw                | Adapter trimming   |                          |                      |                    | 3' end trimming    |                          | Quality score based trimming |                    |                    |                          |                          |                      |
|-----------------------------------|--------------------|--------------------|--------------------------|----------------------|--------------------|--------------------|--------------------------|------------------------------|--------------------|--------------------|--------------------------|--------------------------|----------------------|
| Tools                             | NA                 | ngsShoRT (v 2.1)   | NGS QC Toolkit (v 2.3.2) | Trimmomatic (v 0.32) | cutAdpt (v 1.3)    | ngsShoRT (v 2.1)   | NGS QC Toolkit (v 2.3.2) | ngsShoRT (v 2.1)             | ngsShoRT (v 2.1)   | ngsShoRT (v 2.1)   | NGS QC Toolkit (v 2.3.2) | NGS QC Toolkit (v 2.3.2) | Trimmomatic (v 0.32) |
| DataSet                           | raw                | 1 5adpt            | 1 5adpt                  | 1 illuminaAdpt       | 1 cutAdpt          | 3 3end             | 2 3end                   | 2 TERA                       | 4 LQR              | 5 Mott             | 3 LQR                    | 4 qualCutoff             | 2 slidingWindow      |
| Reference genome size             | 5,498,450          | 5,498,450          | 5,498,450                | 5,498,450            | 5,498,450          | 5,498,450          | 5,498,450                | 5,498,450                    | 5,498,450          | 5,498,450          | 5,498,450                | 5,498,450                | 5,498,450            |
| Number of reads                   | 4,490,536          | 4,490,534          | 4,208,770                | 4,490,455            | 4,490,459          | 4,489,637          | 4,490,080                | 4,490,265                    | 4,353,255          | 4,490,265          | 4,333,887                | 4,490,536                | 4,490,521            |
| Mapped reads                      | 4,347,142 / 96.81% | 4,347,138 / 96.81% | 4,078,188 / 96.9%        | 4,347,112 / 96.81%   | 4,346,940 / 96.8%  | 4,345,328 / 96.79% | 4,346,237 / 96.8%        | 4,335,353 / 96.55%           | 4,218,371 / 96.9%  | 4,335,353 / 96.55% | 4,199,755 / 96.91%       | 4,347,142 / 96.81%       | 4,346,782 / 96.8%    |
| Unmapped reads                    | 143,394 / 3.19%    | 143,396 / 3.19%    | 130,582 / 3.1%           | 143,343 / 3.19%      | 143,519 / 3.2%     | 144,309 / 3.21%    | 143,843 / 3.2%           | 154,912 / 3.45%              | 134,884 / 3.1%     | 154,912 / 3.45%    | 134,132 / 3.09%          | 143,394 / 3.19%          | 143,739 / 3.2%       |
| Paired reads                      | 4,347,142 / 96.81% | 4,347,137 / 96.81% | 3,874,143 / 92.05%       | 4,347,102 / 96.81%   | 4,346,940 / 96.8%  | 4,345,328 / 96.79% | 4,346,237 / 96.8%        | 4,335,353 / 96.55%           | 4,102,953 / 94.25% | 4,335,353 / 96.55% | 4,073,930 / 94%          | 4,347,142 / 96.81%       | 4,345,050 / 96.76%   |
| Mapped reads, only first in pair  | 2,175,571 / 48.45% | 2,175,570 / 48.45% | 1,936,999 / 46.02%       | 2,175,553 / 48.45%   | 2,175,484 / 48.45% | 2,174,613 / 48.44% | 2,175,081 / 48.44%       | 2,174,913 / 48.44%           | 2,051,407 / 47.12% | 2,174,913 / 48.44% | 2,036,872 / 47%          | 2,175,571 / 48.45%       | 2,174,682 / 48.43%   |
| Mapped reads, only second in pair | 2,171,571 / 48.36% | 2,171,567 / 48.36% | 1,937,144 / 46.03%       | 2,171,549 / 48.36%   | 2,171,456 / 48.36% | 2,170,715 / 48.35% | 2,171,156 / 48.35%       | 2,160,440 / 48.11%           | 2,051,546 / 47.13% | 2,160,440 / 48.11% | 2,037,058 / 47%          | 2,171,571 / 48.36%       | 2,170,368 / 48.33%   |
| Mapped reads, both in pair        | 4,340,744 / 96.66% | 4,340,737 / 96.66% | 3,872,430 / 92.01%       | 4,340,708 / 96.67%   | 4,340,474 / 96.66% | 4,338,554 / 96.63% | 4,339,658 / 96.65%       | 4,318,400 / 96.17%           | 4,101,058 / 94.21% | 4,318,400 / 96.17% | 4,072,120 / 93.96%       | 4,340,744 / 96.66%       | 4,338,361 / 96.61%   |
| Mapped reads, singletons          | 6,398 / 0.14%      | 6,400 / 0.14%      | 1,713 / 0.04%            | 6,394 / 0.14%        | 6,466 / 0.14%      | 6,774 / 0.15%      | 6,579 / 0.15%            | 16,953 / 0.38%               | 1,895 / 0.04%      | 16,953 / 0.38%     | 1,810 / 0.04%            | 6,398 / 0.14%            | 6,689 / 0.15%        |
| Read min/max/mean length          | 30 / 150 / 149.85  | 30 / 150 / 149.44  | 30 / 150 / 149.84        | 21 / 150 / 148.91    | 30 / 150 / 147.4   | 30 / 140 / 139.88  | 30 / 145 / 144.86        | 21 / 150 / 144.04            | 30 / 150 / 149.85  | 21 / 150 / 144.04  | 30 / 150 / 149.85        | 30 / 150 / 149.85        | 21 / 150 / 149.59    |
| Clipped reads                     | 817,083 / 18.2%    | 775,935 / 17.28%   | 706,065 / 16.78%         | 694,549 / 15.47%     | 345,784 / 7.7%     | 537,645 / 11.98%   | 670,780 / 14.94%         | 665,970 / 14.83%             | 756,534 / 17.38%   | 665,960 / 14.83%   | 750,421 / 17.32%         | 817,083 / 18.2%          | 808,999 / 18.02%     |
| Duplication rate                  | 37.31%             | 37.36%             | 35.79%                   | 37.47%               | 40.13%             | 36.84%             | 37.04%                   | 37.14%                       | 36.60%             | 37.15%             | 36.49%                   | 37.31%                   | 37.32%               |
| GC (%)                            | 50.86%             | 50.87%             | 50.65%                   | 50.87%               | 50.91%             | 50.86%             | 50.86%                   | 50.72%                       | 50.76%             | 50.72%             | 50.75%                   | 50.86%                   | 50.86%               |
| Total reads with indels           | 21,384             | 21,396             | 17,769                   | 21,416               | 19,792             | 19,387             | 20,426                   | 17,697                       | 19,109             | 17,701             | 18,952                   | 21,384                   | 21,362               |
| Insertions                        | 9,452              | 9,459              | 7,731                    | 9,464                | 8,409              | 8,433              | 8,976                    | 7,489                        | 8,357              | 7,494              | 8,280                    | 9,452                    | 9,447                |
| Deletions                         | 11,932             | 11,937             | 10,038                   | 11,952               | 11,383             | 10,954             | 11,450                   | 10,208                       | 10,752             | 10,207             | 10,672                   | 11,932                   | 11,915               |
| Mean insert size                  | 198.75             | 198.75             | 198.01                   | 198.75               | 197.96             | 198.16             | 198.44                   | 198.33                       | 198.14             | 198.33             | 198.1                    | 198.75                   | 198.74               |
| Median insert size                | 188                | 188                | 187                      | 188                  | 187                | 188                | 188                      | 187                          | 187                | 187                | 187                      | 188                      | 188                  |
| Mapping runtime (mins)            | 0.98               | 0.96               | 0.78                     | 0.83                 | 0.82               | 1.06               | 0.68                     | 0.88                         | 0.76               | 0.83               | 0.62                     | 0.78                     | 0.98                 |
