# Supplementary material for: Software for pre-processing Illumina next-generation sequencing short read sequences
Source: Springer Nature journal article supplement (doi:10.1186/1751-0473-9-8), 2014-05-03
Supplement: 13029_2013_109_MOESM5_ESM.pdf [file 13029_2013_109_MOESM5_ESM.pdf]

*Caenorhabditis elegans*

*Sacchariomyces cerevisiae S288c*

*Escherichia coli O157 H7*

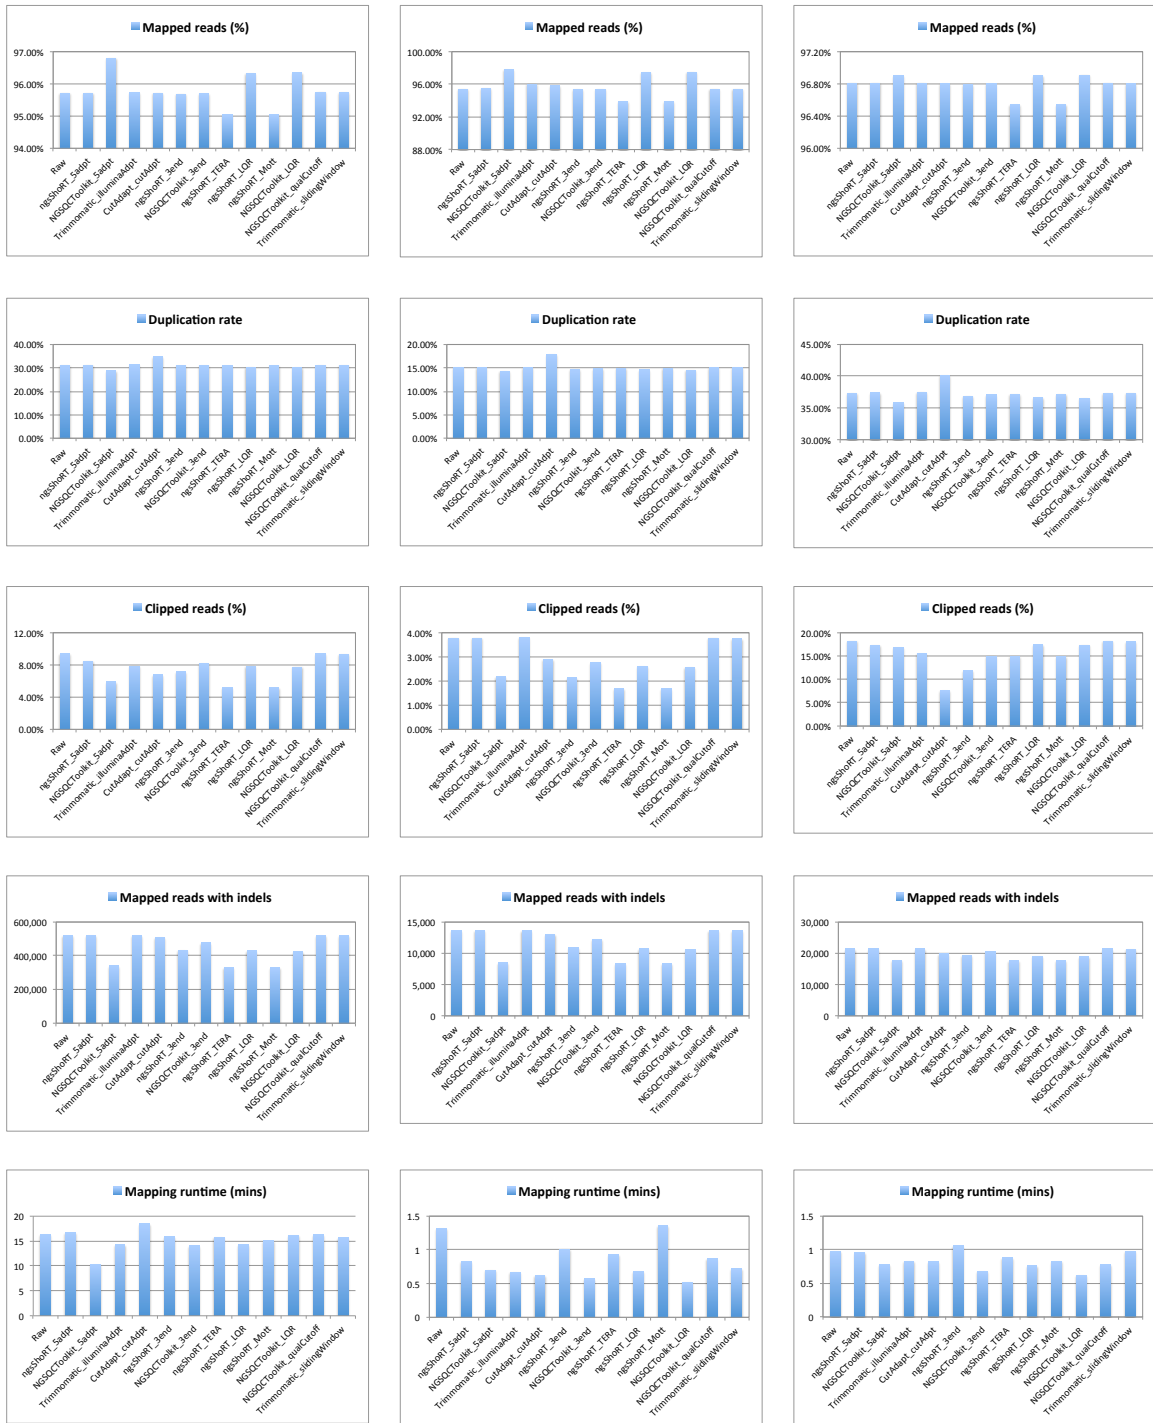

**Figure 10. Summary of reference-base assemblies of the trimmed data generated by *ngsShoRT* algorithms and other tools**
